# Supplementary material for: Palladium-catalyzed Suzuki–Miyaura coupling of aryl sulfamates with arylboronic acids
Source: Royal Society of Chemistry journal article supplement (doi:10.1039/c3ob41382a), 2013-01-01

# Supporting Information

## Palladium-catalyzed Suzuki-Miyaura coupling of aryl sulfamates with arylboronic acids

Zhan-Yong Wang,<sup>a</sup> Qin-Na Ma,<sup>a</sup> Ren-Hao Li<sup>a</sup> and Li-Xiong Shao<sup>a,b\*</sup>

<sup>a</sup>*College of Chemistry and Materials Engineering, Wenzhou University, Chashan University  
Town, Wenzhou, Zhejiang Province 325035, People's Republic of China.*

Fax: +86-577-86689300 E-mail: [Shaolix@wzu.edu.cn](mailto:Shaolix@wzu.edu.cn)

<sup>b</sup>*College of Chemistry and Life Sciences, Zhejiang Normal University, Jinhua, Zhejiang  
Province 321004, People's Republic of China.*

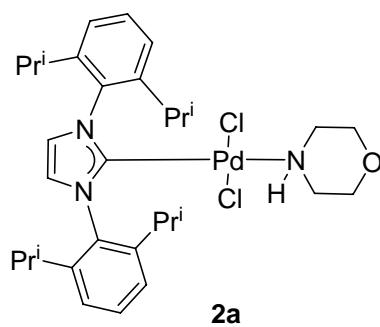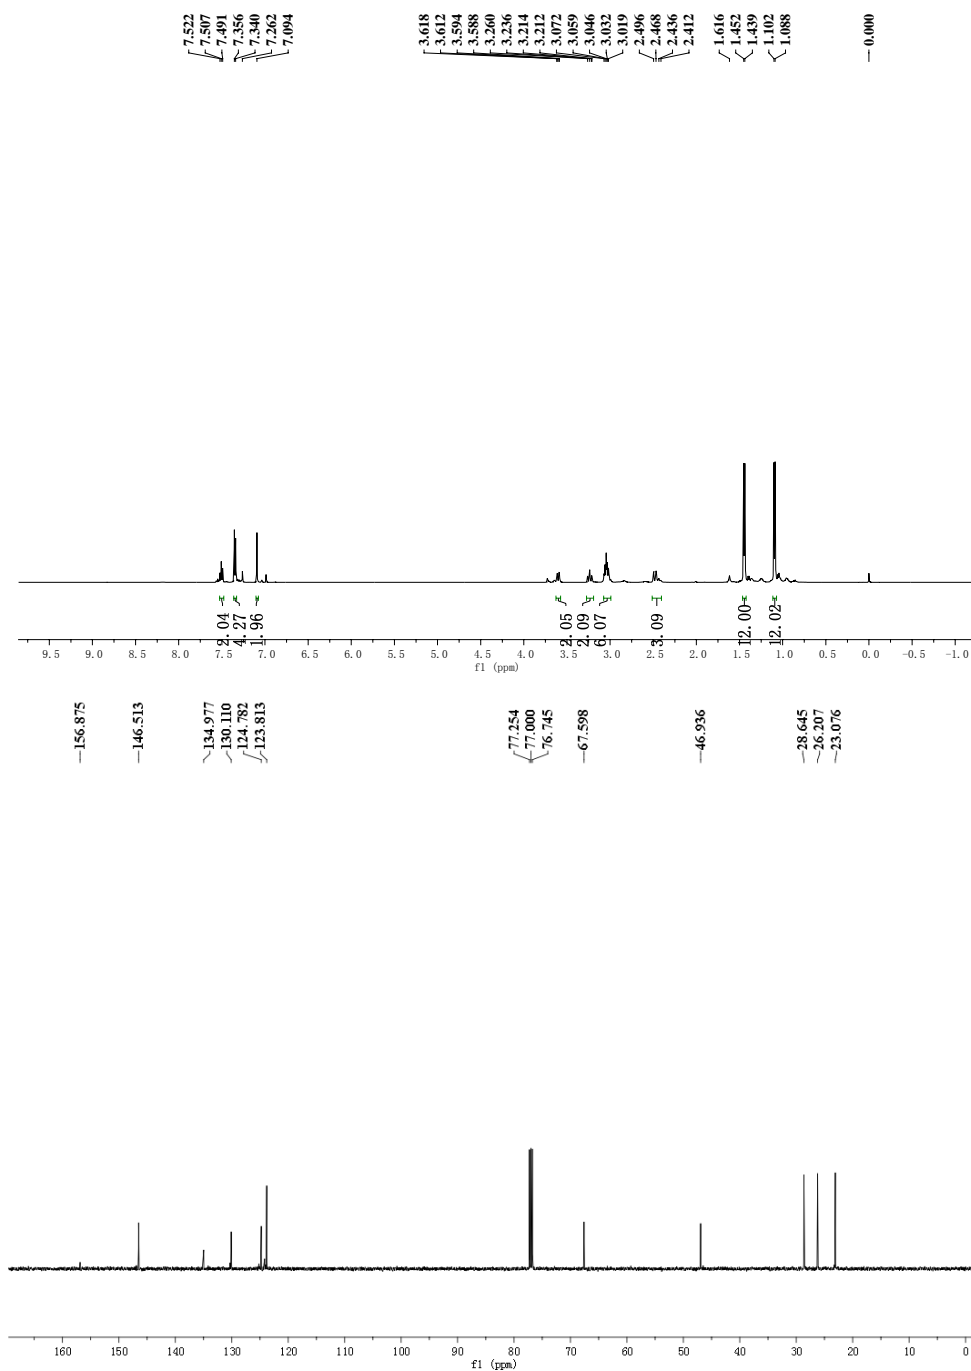

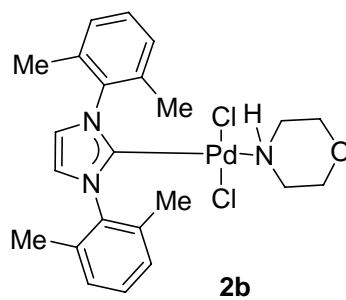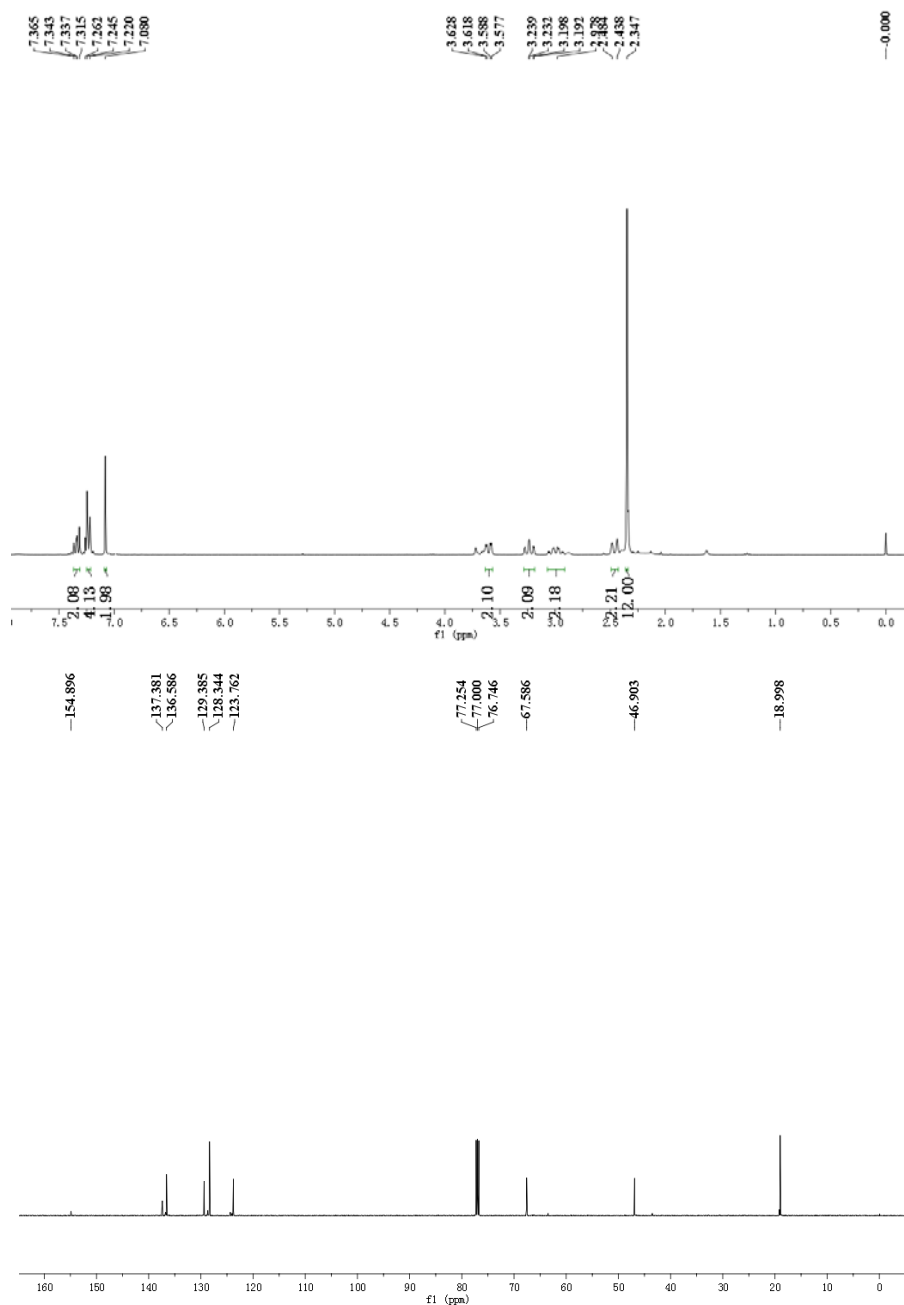

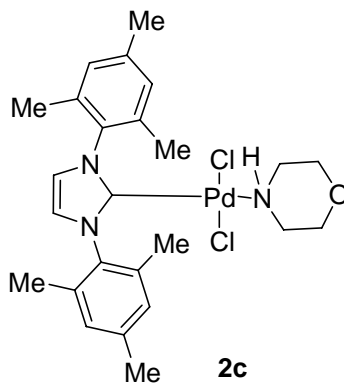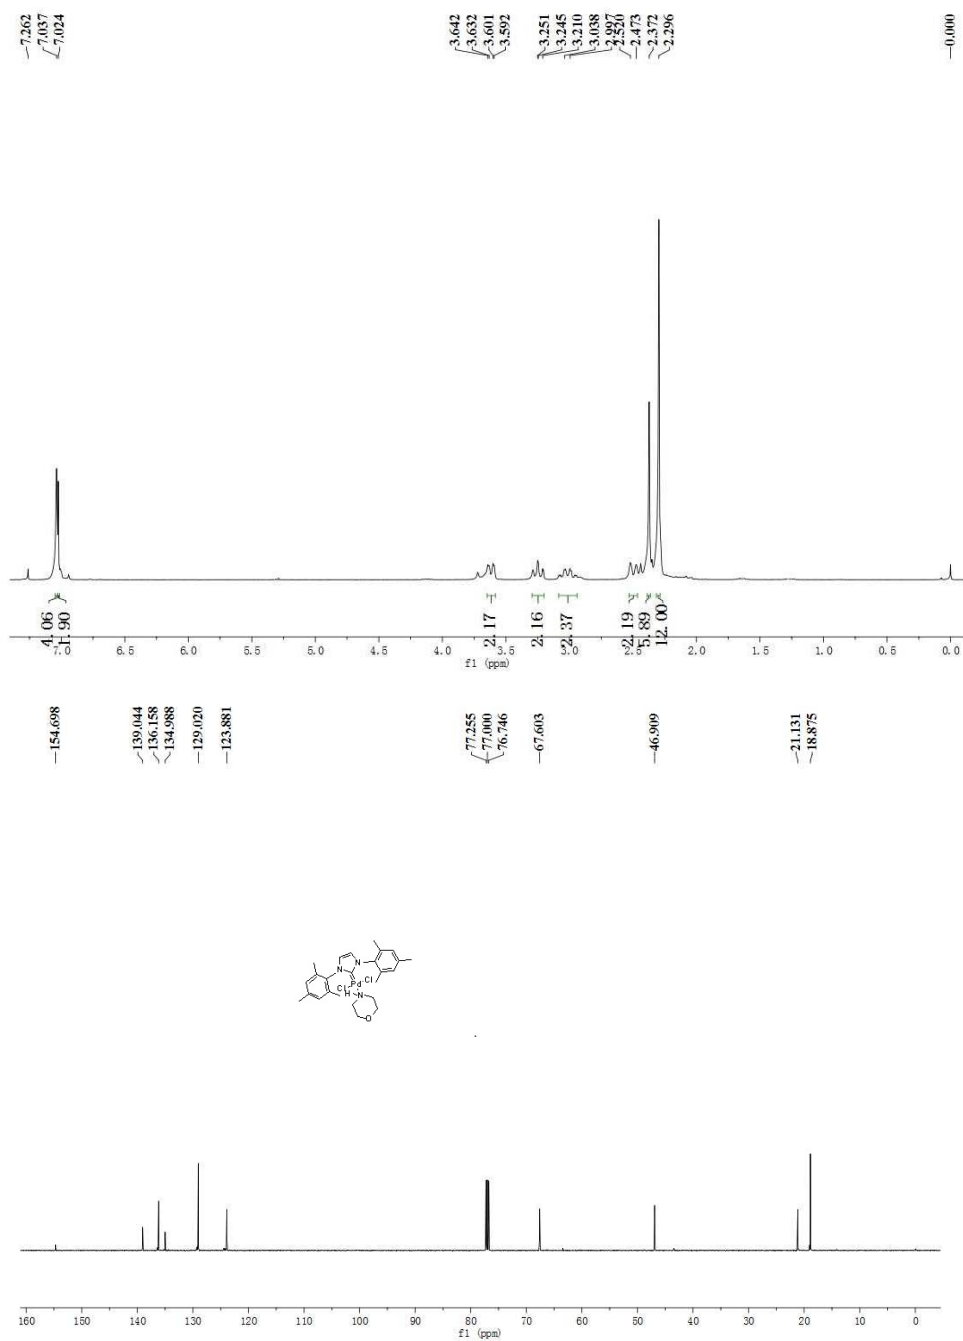

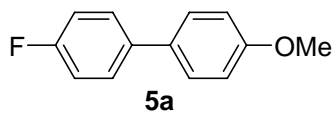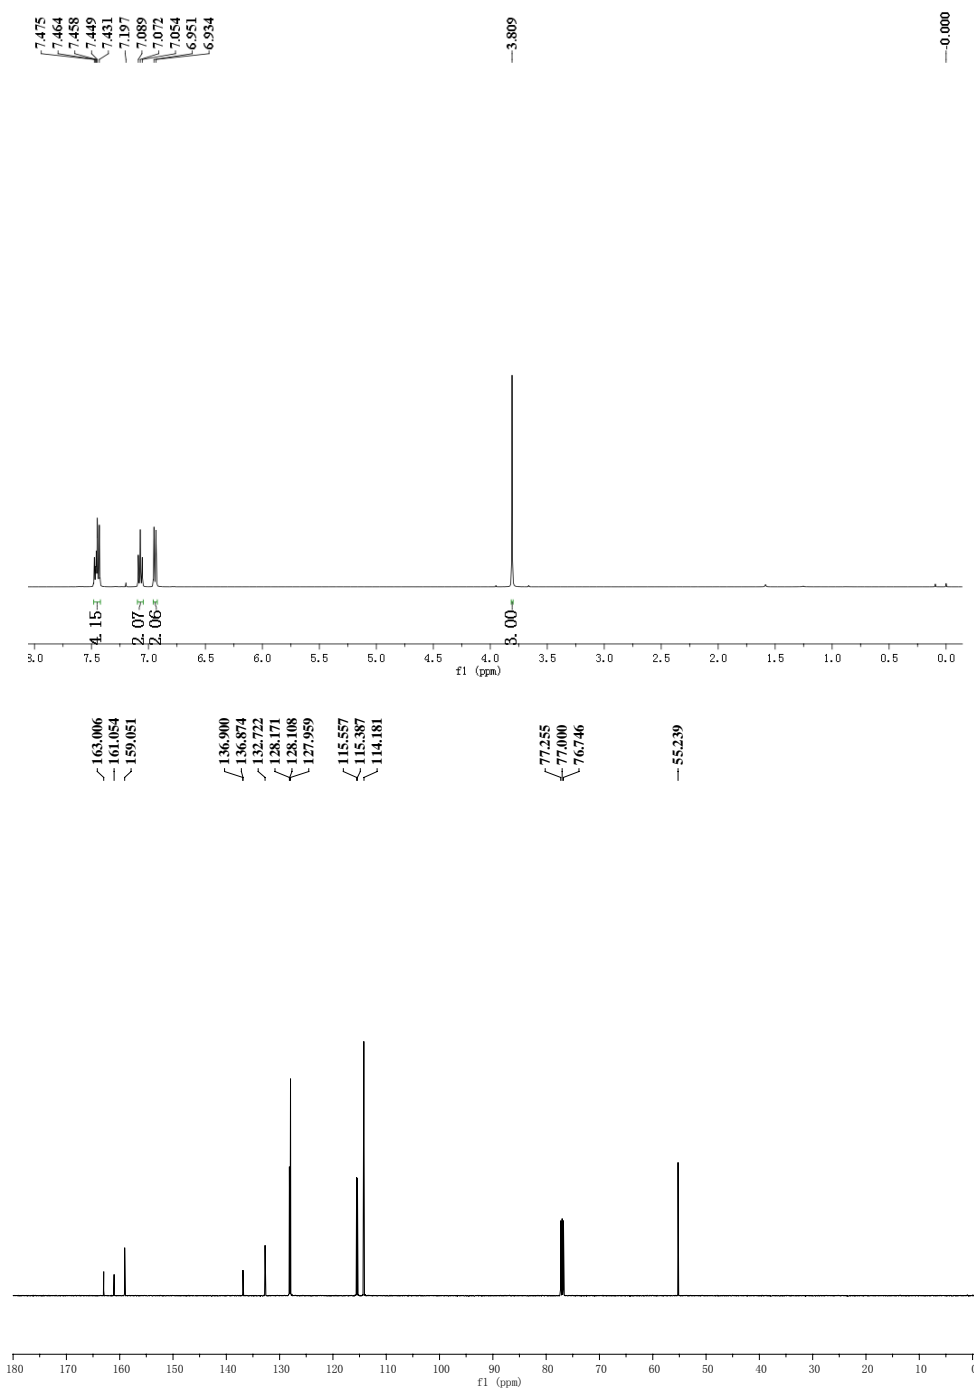

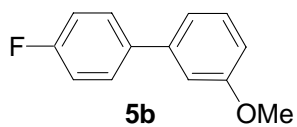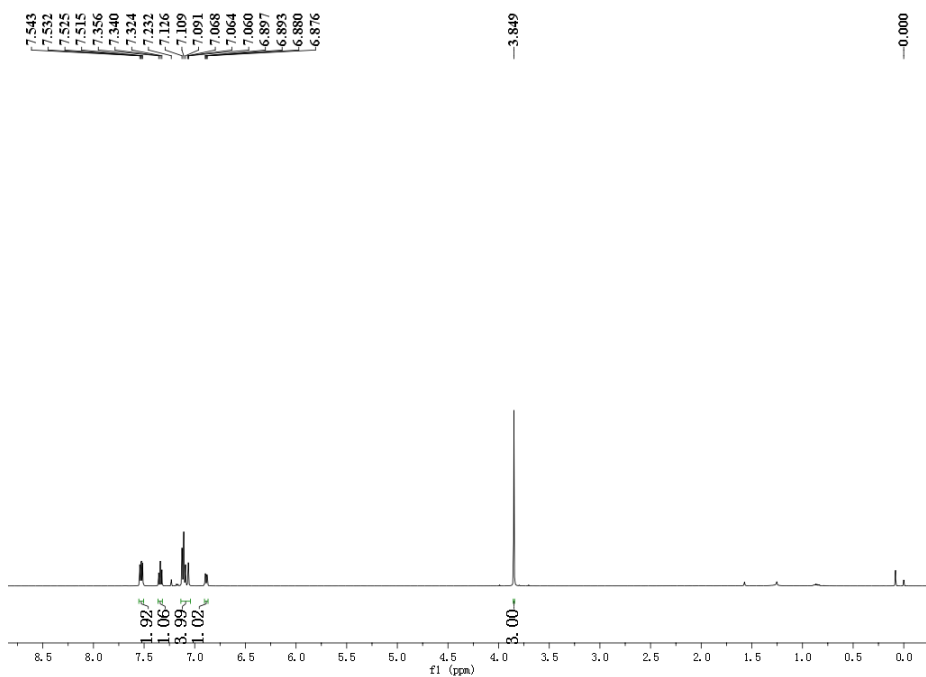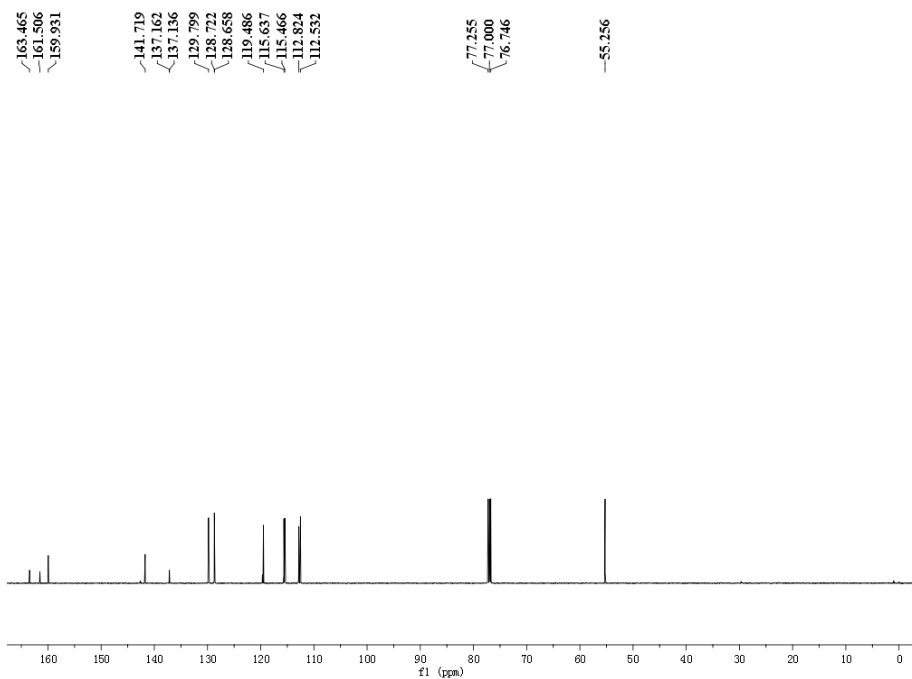

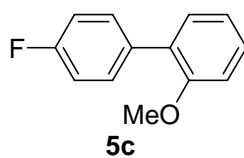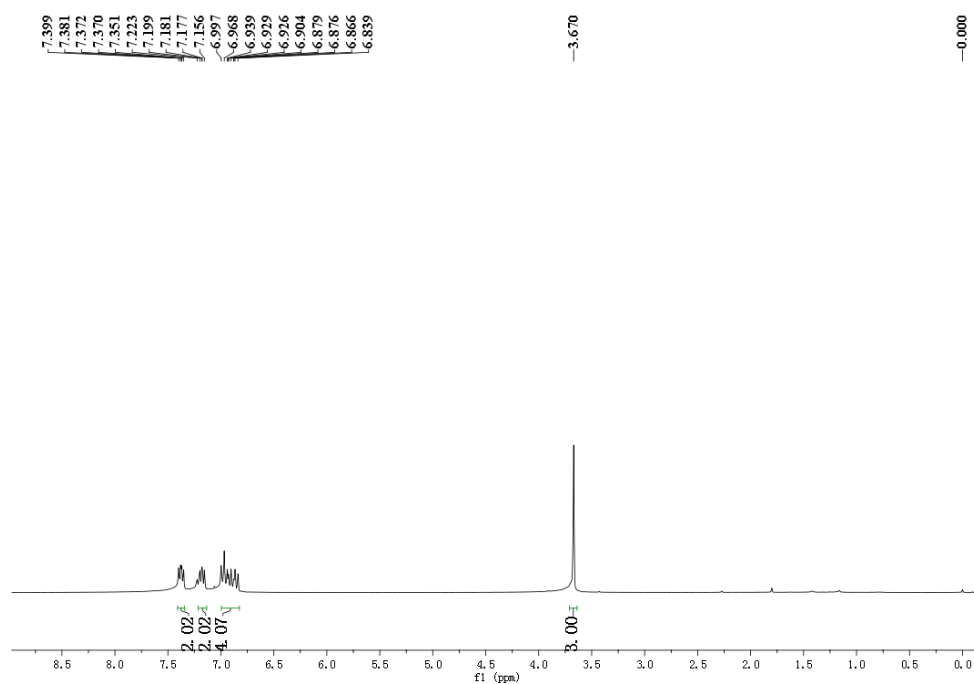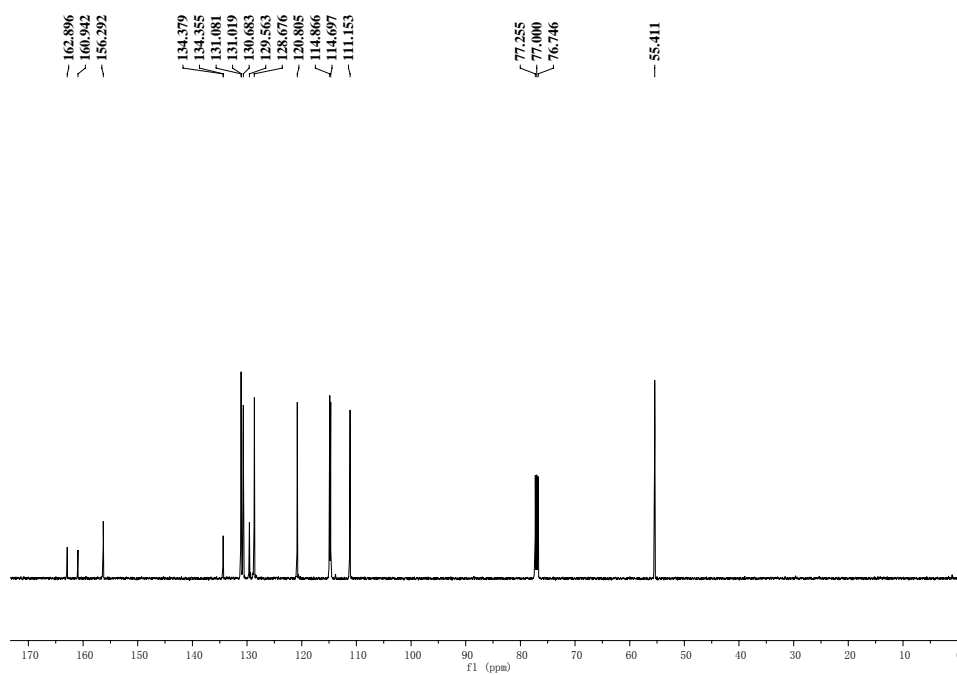

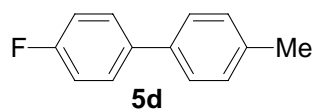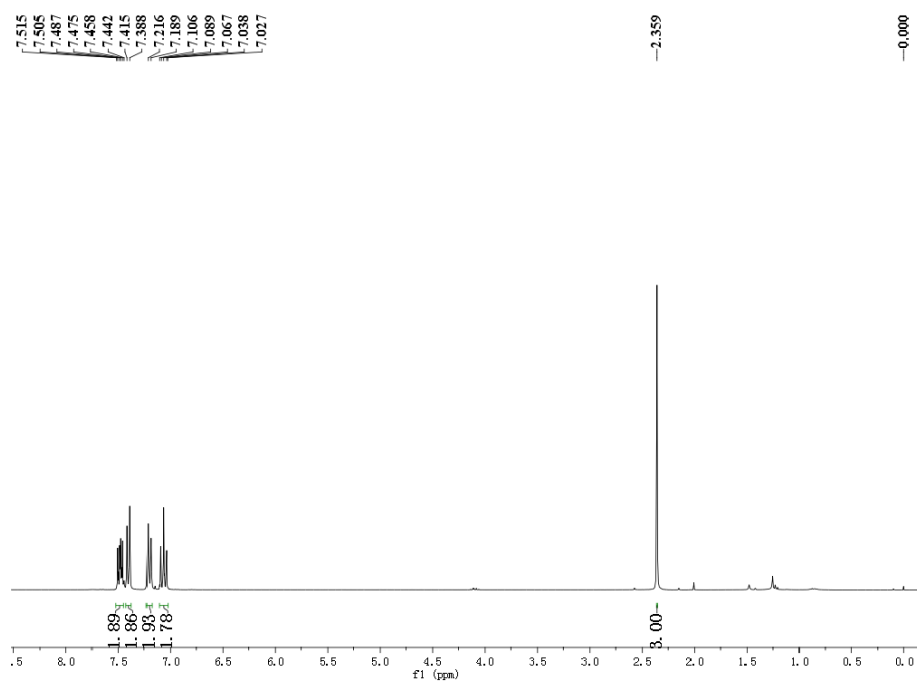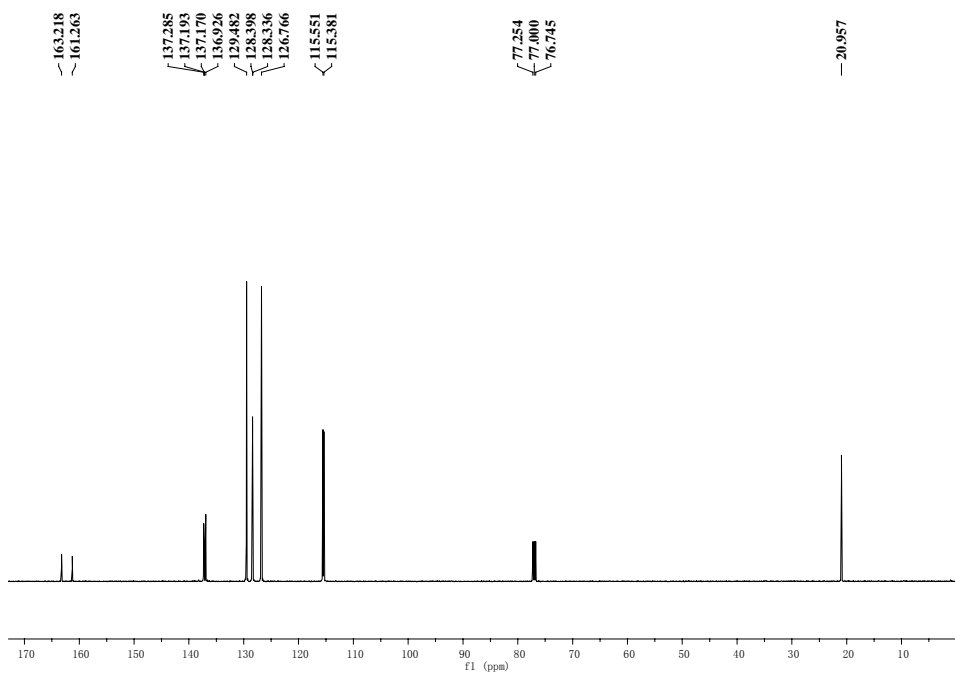



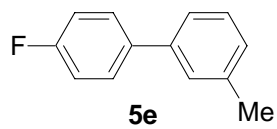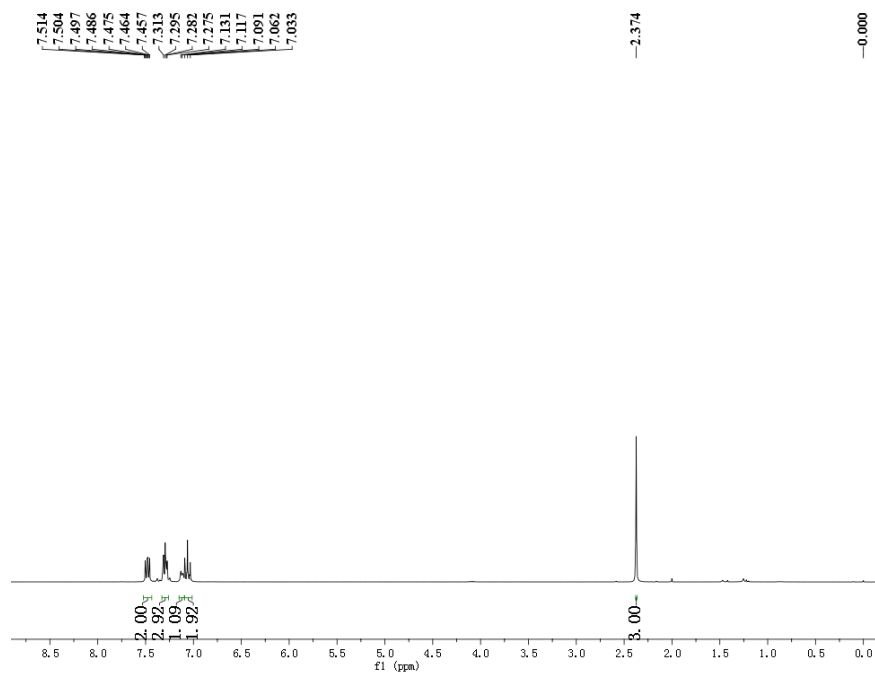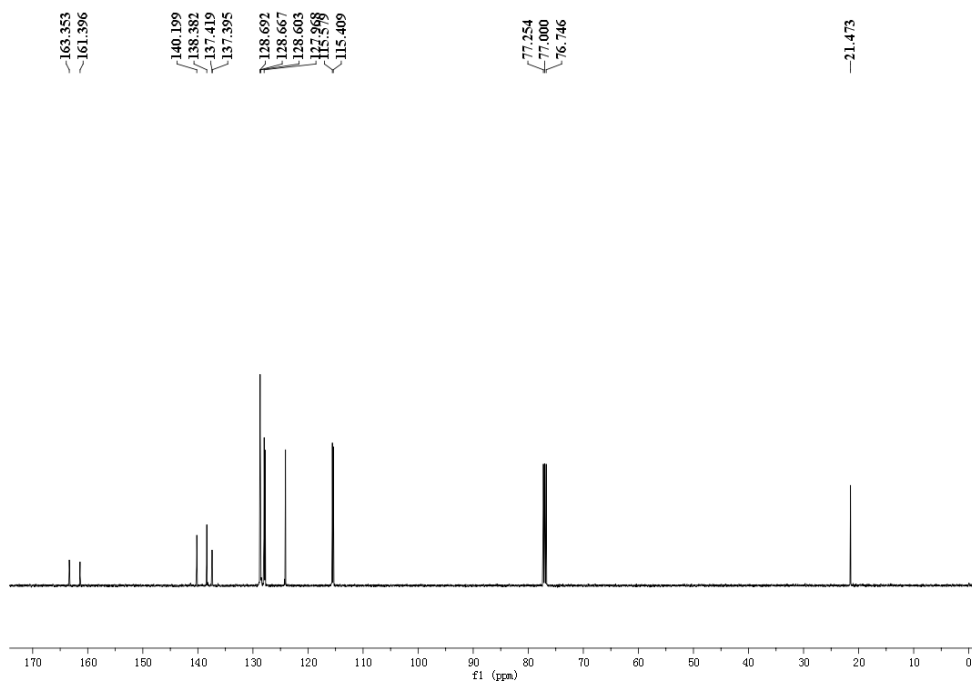

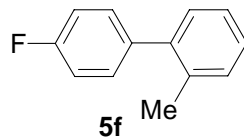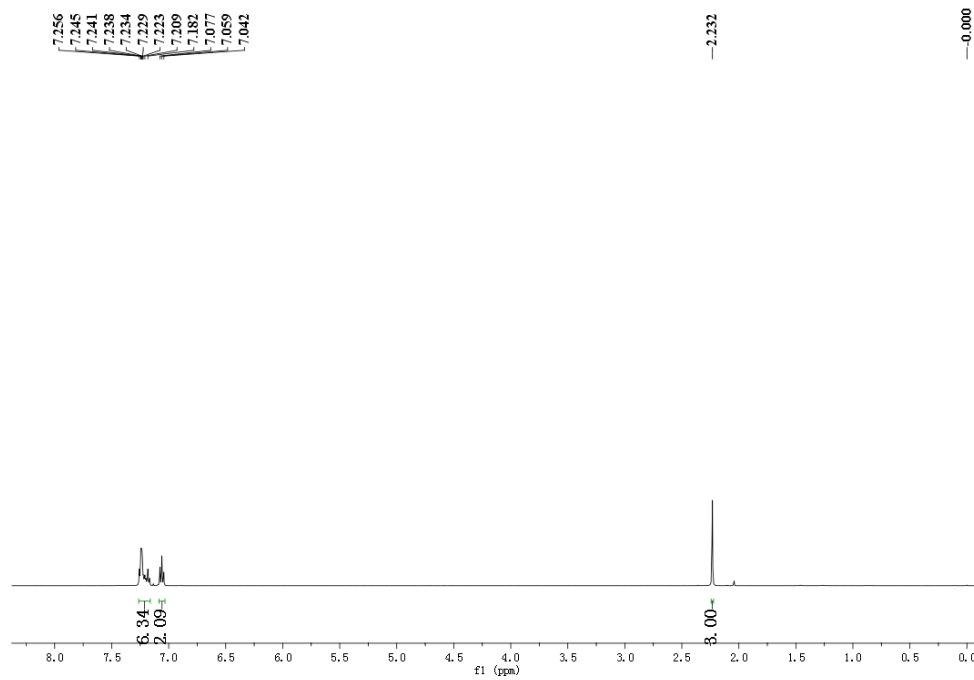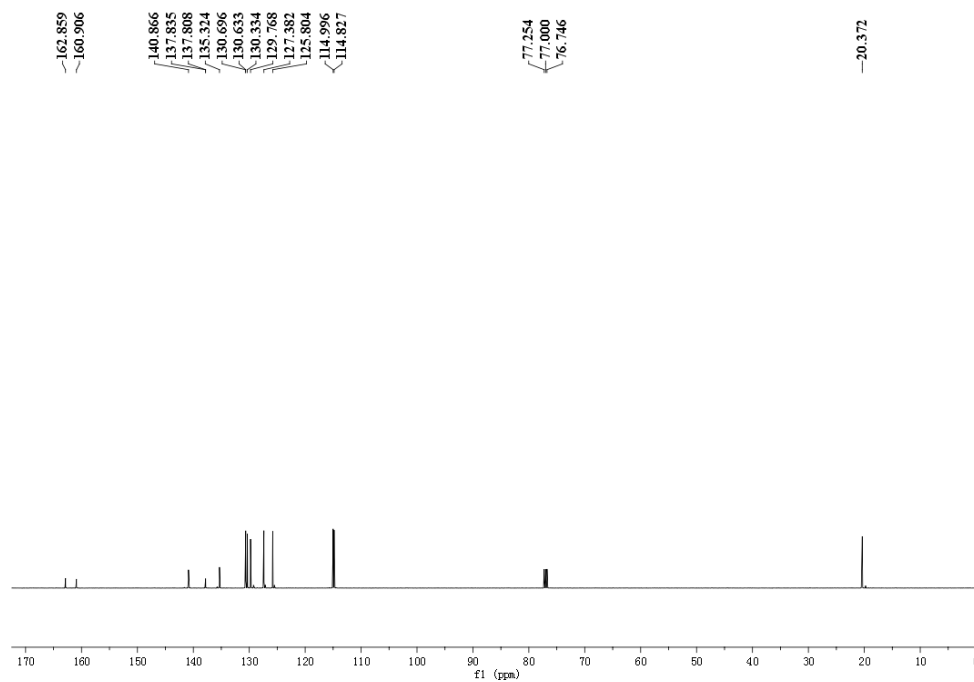

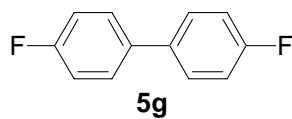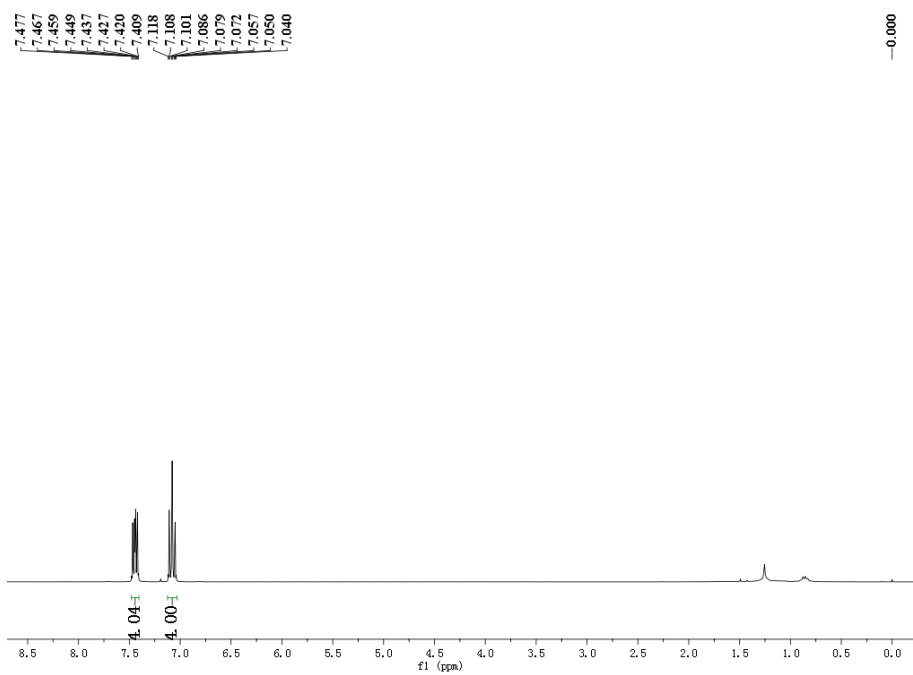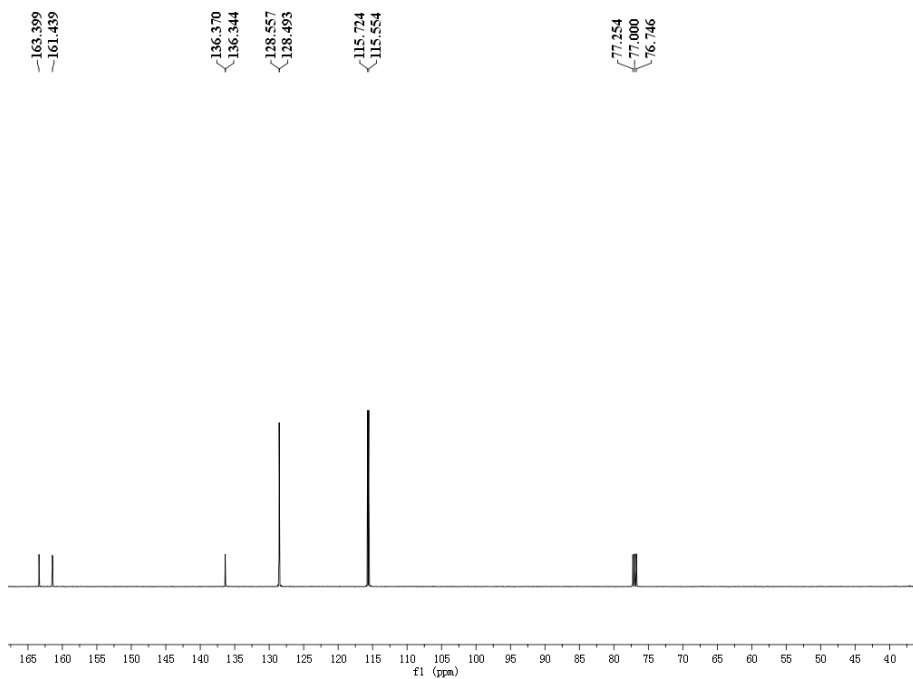

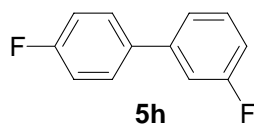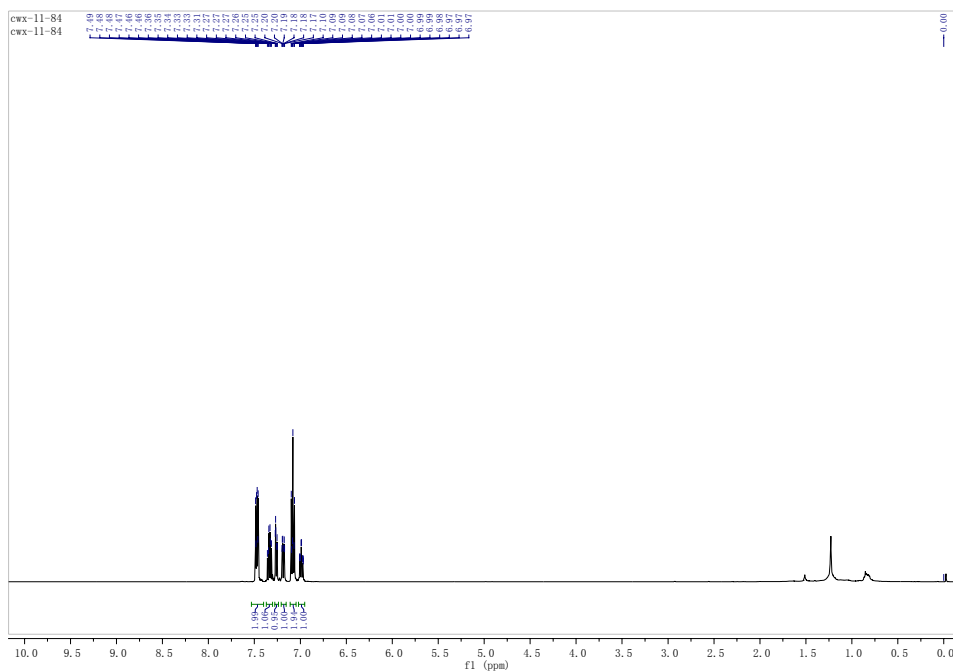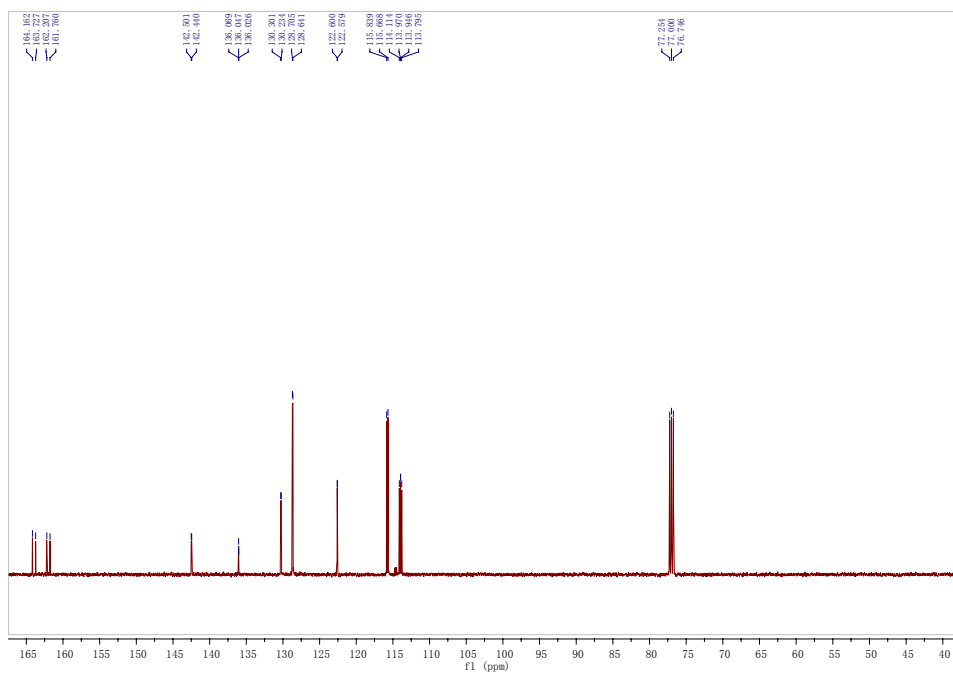

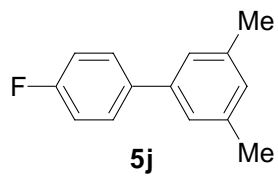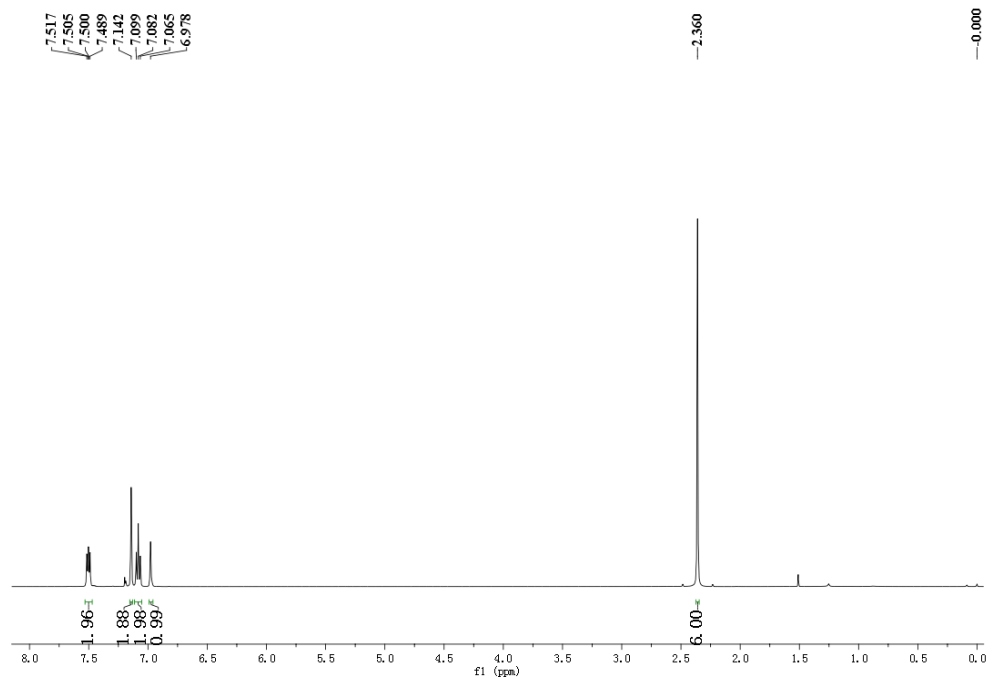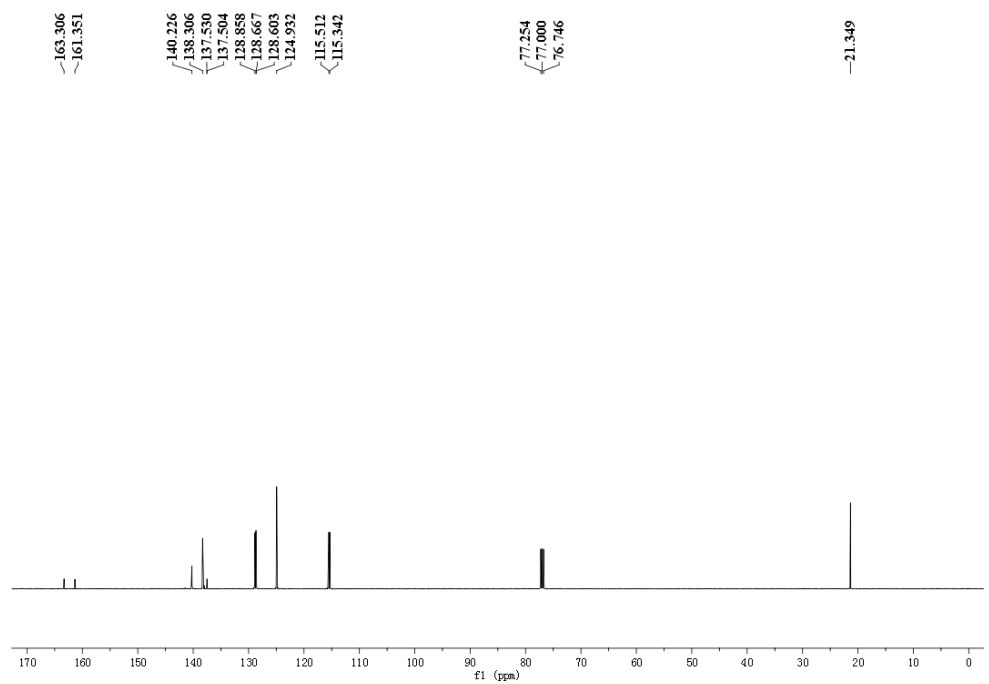

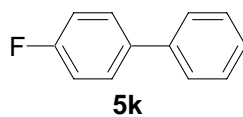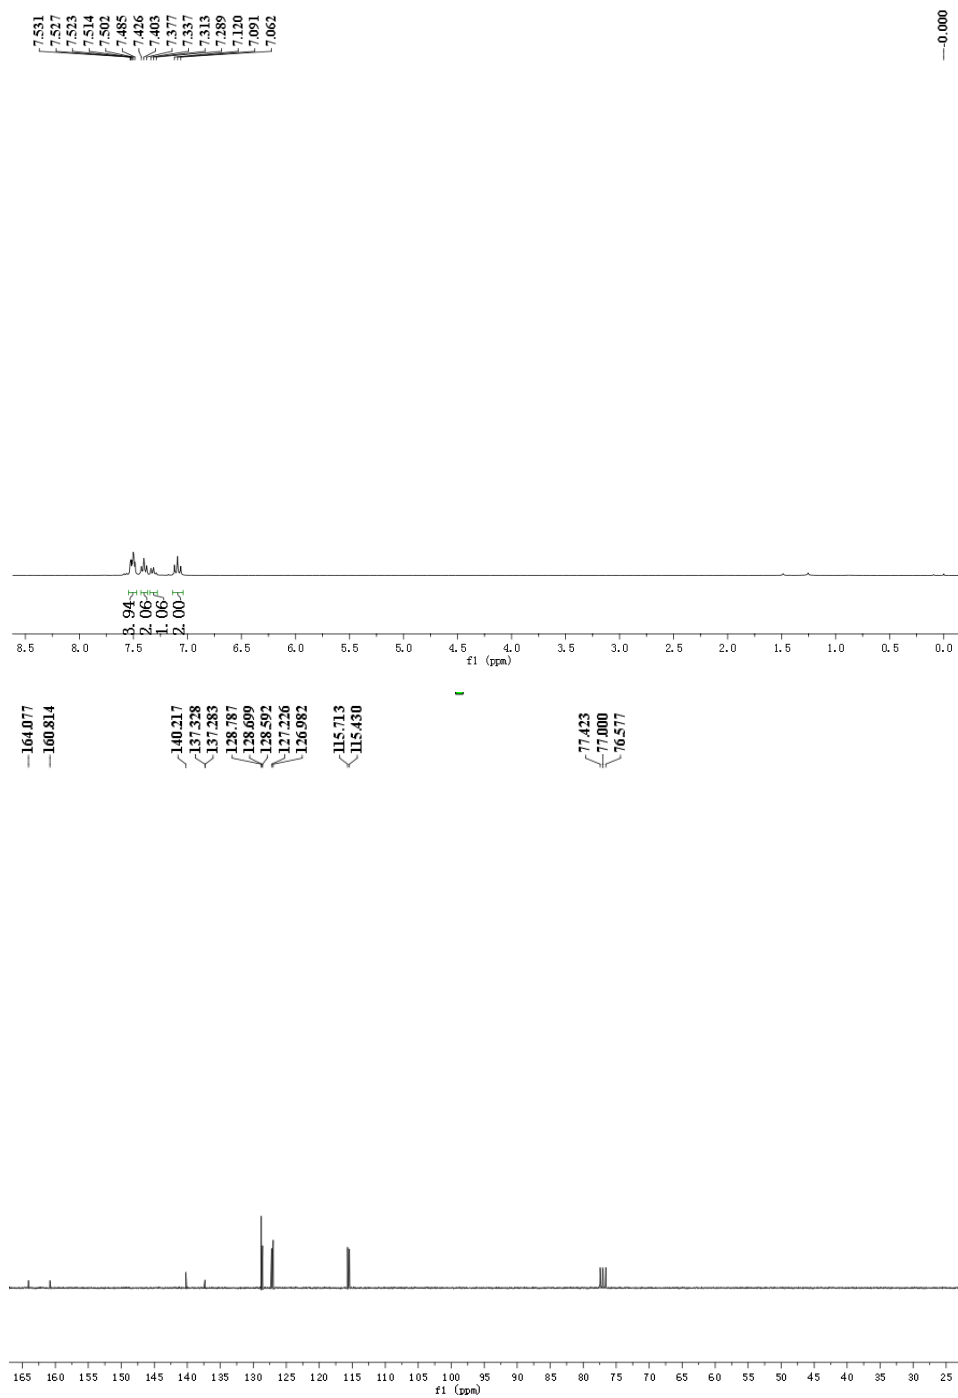

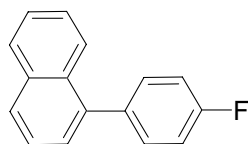

**51**

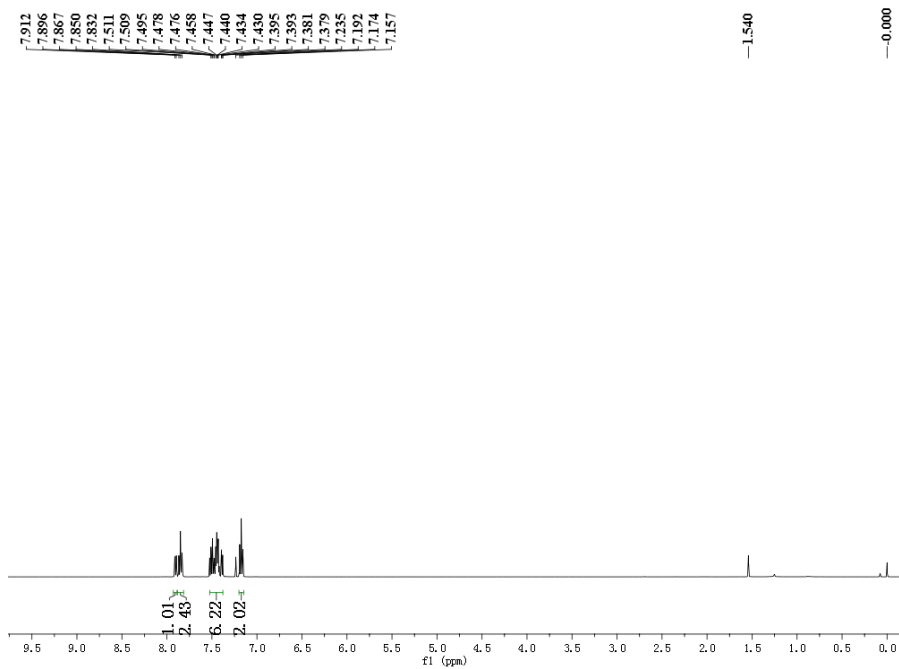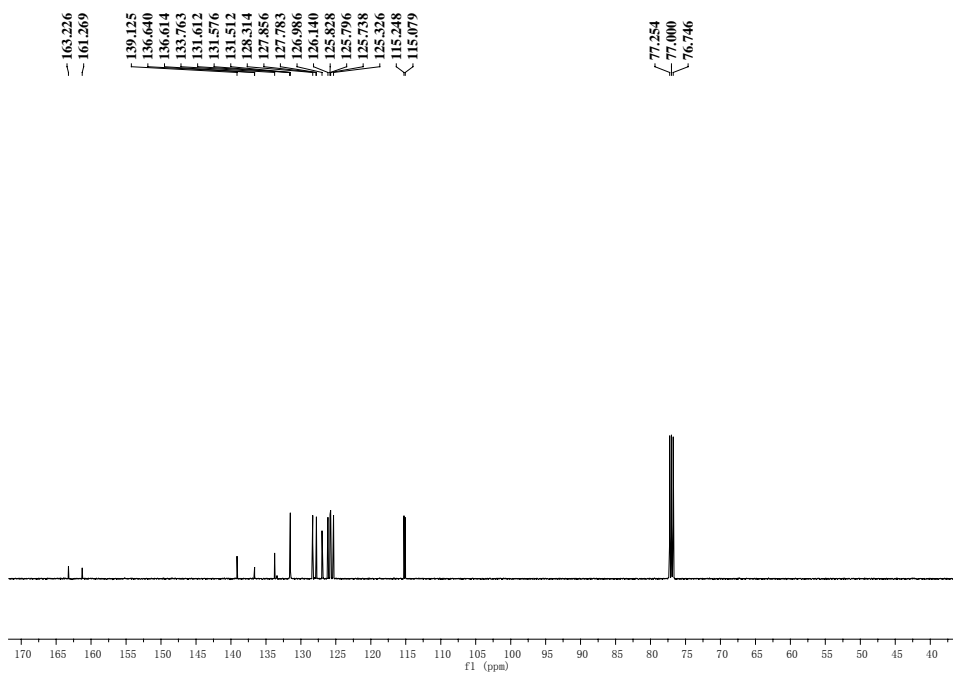

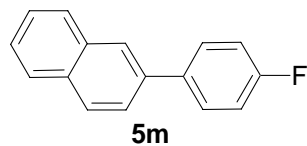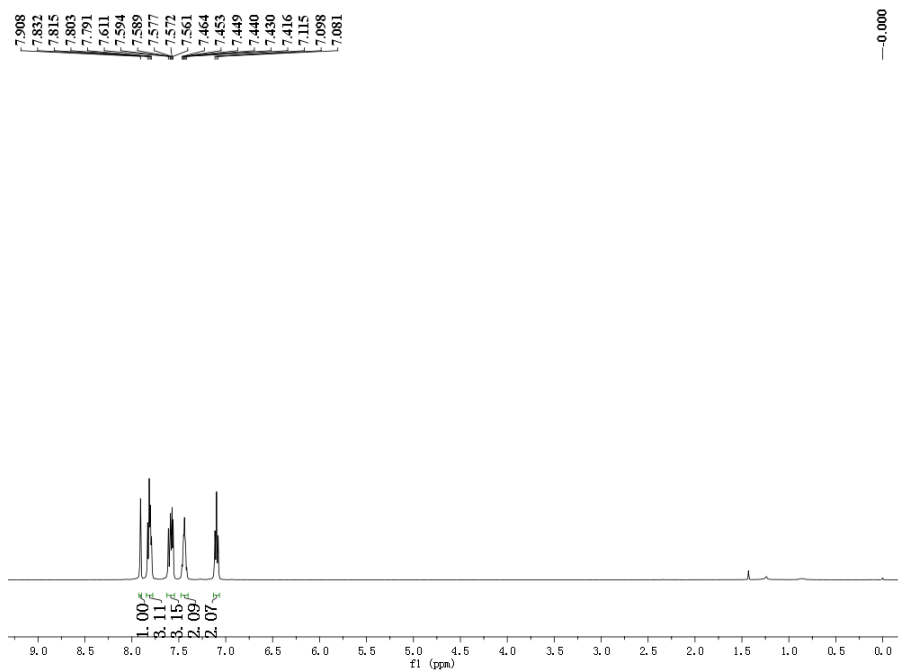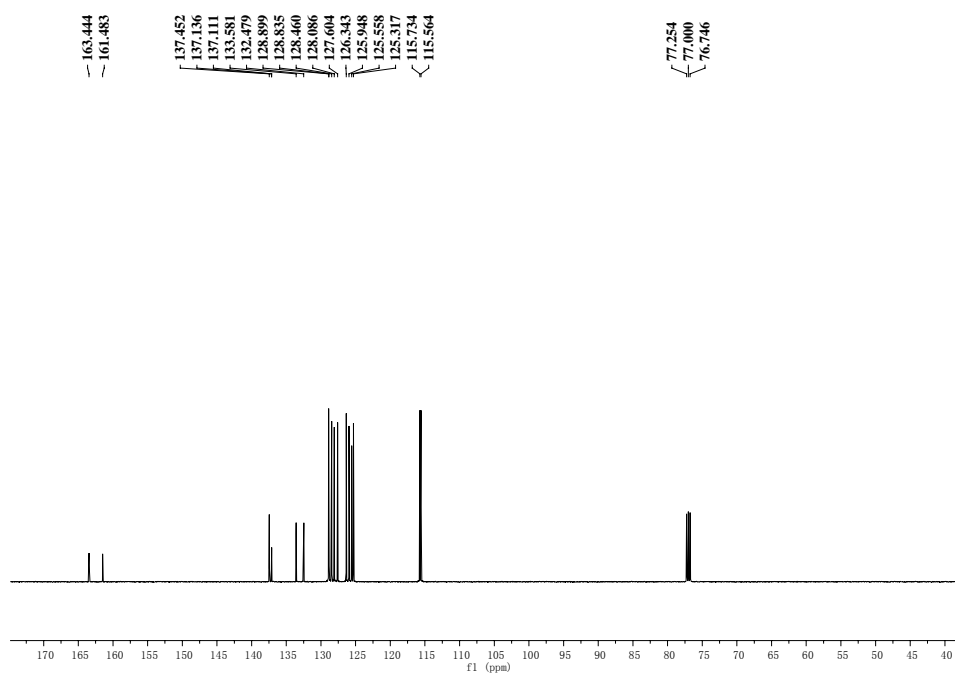



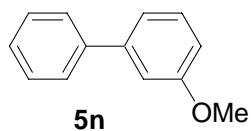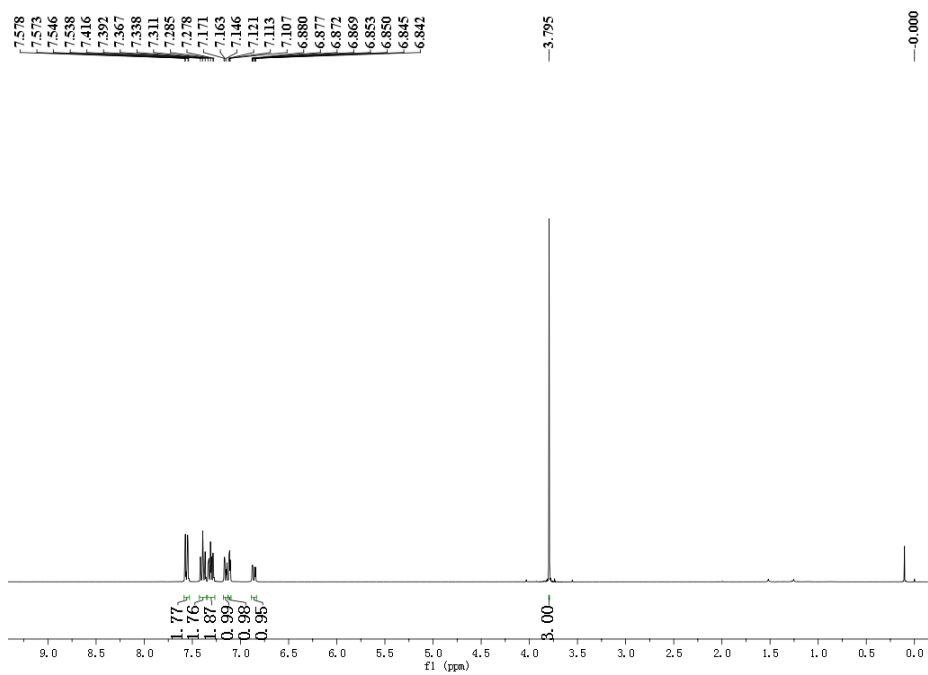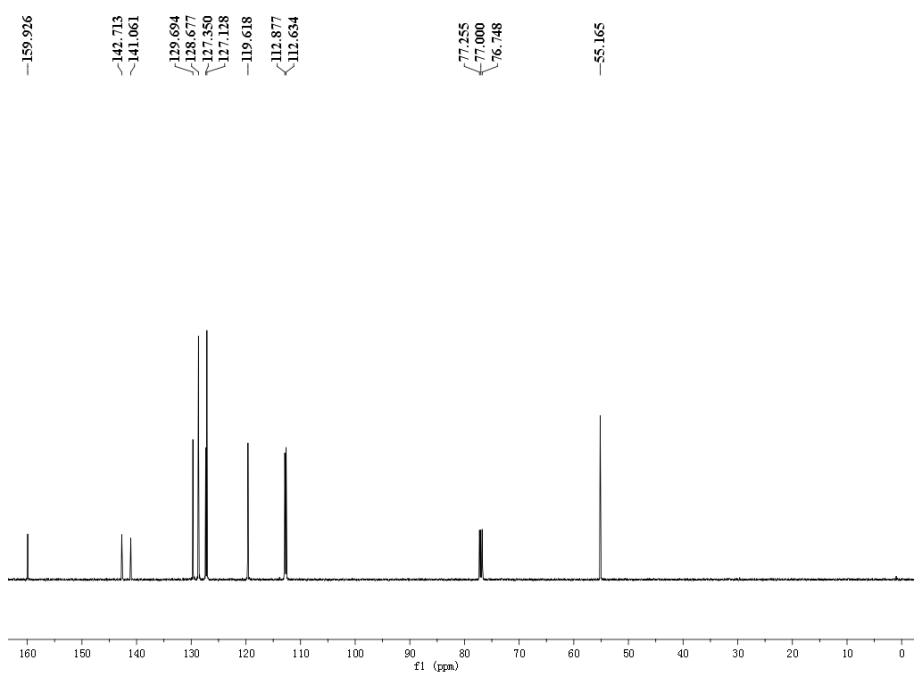

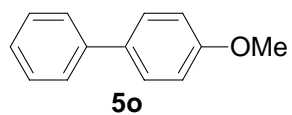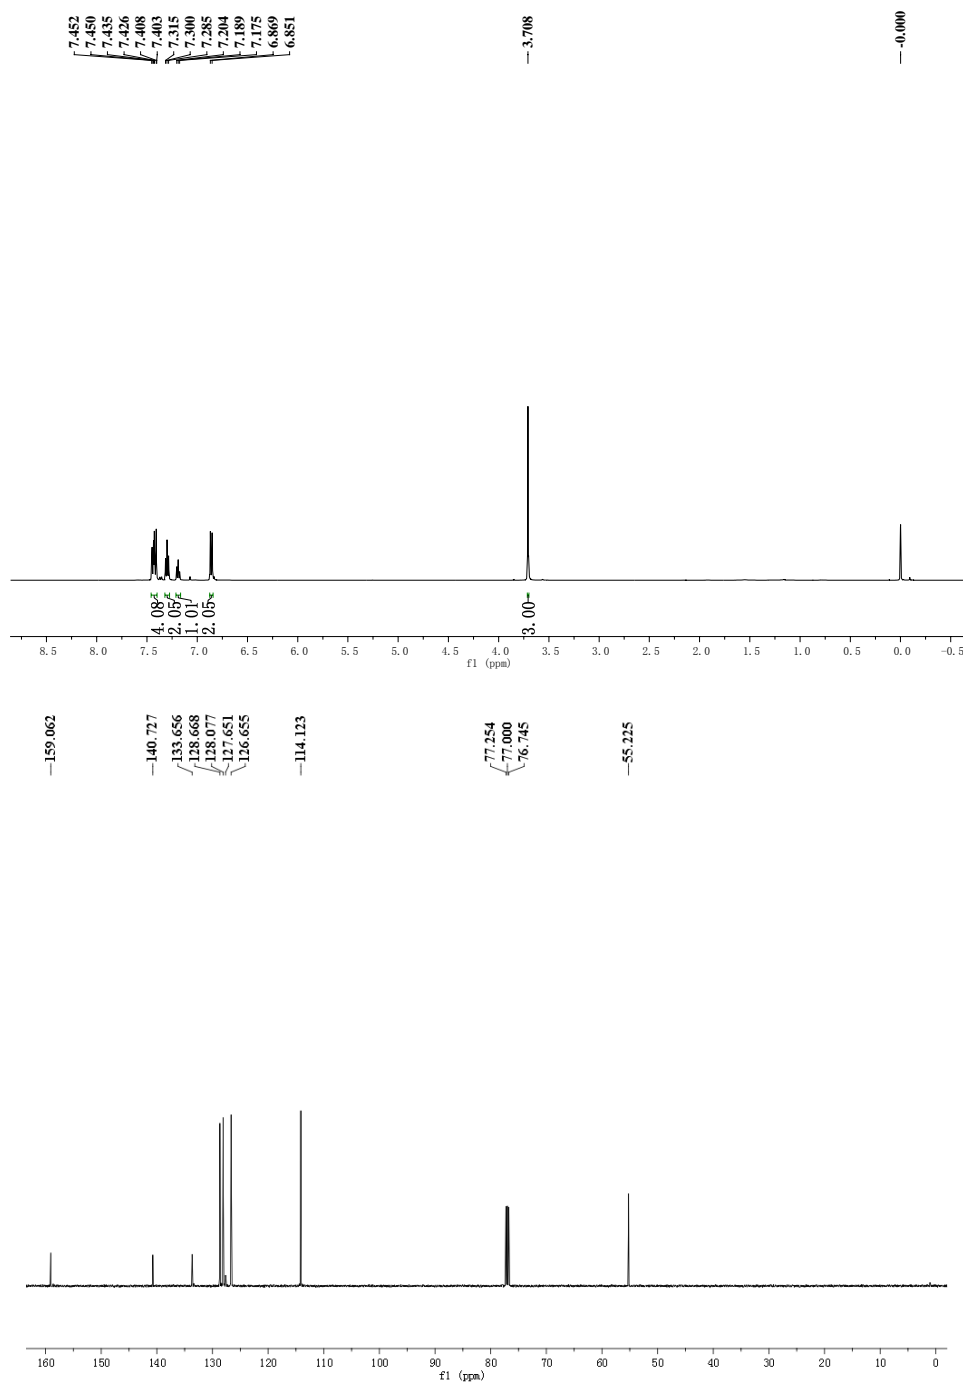

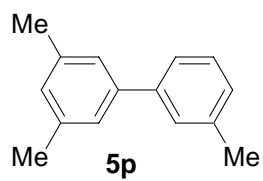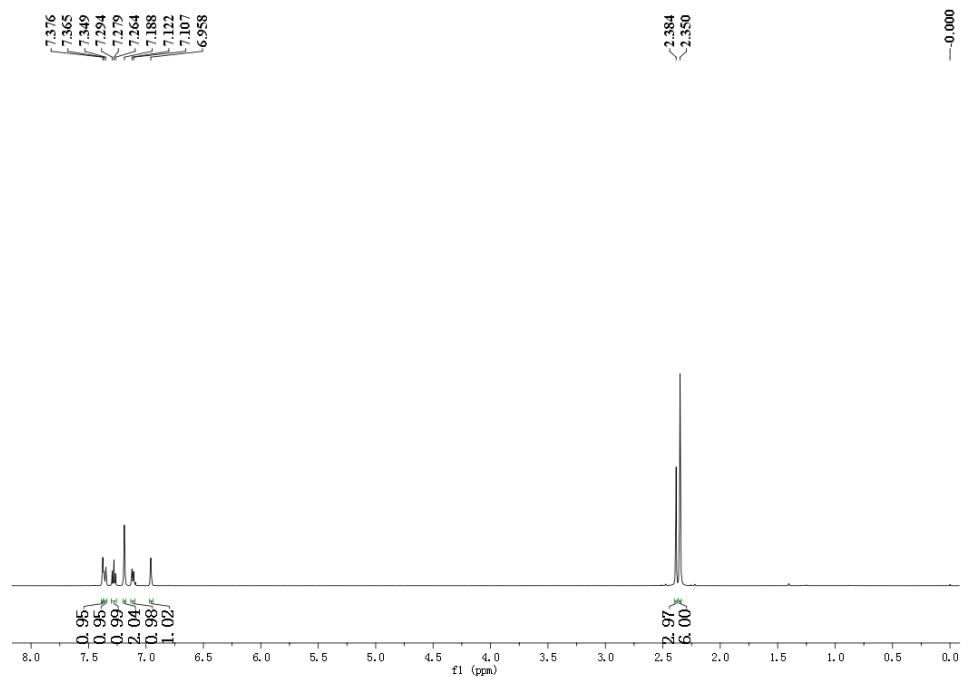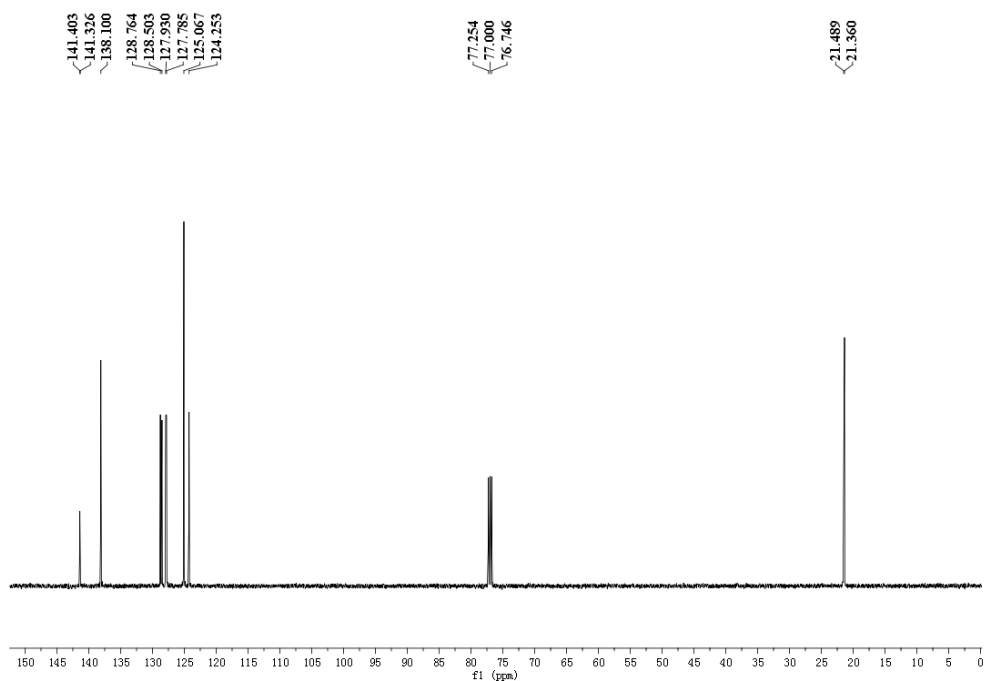

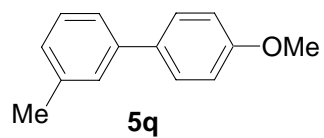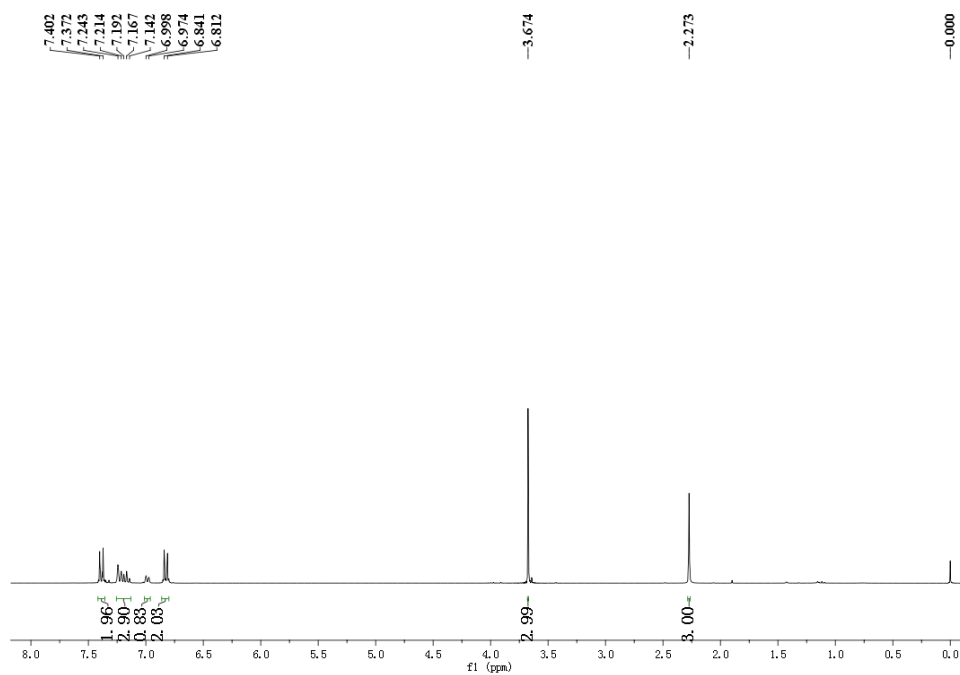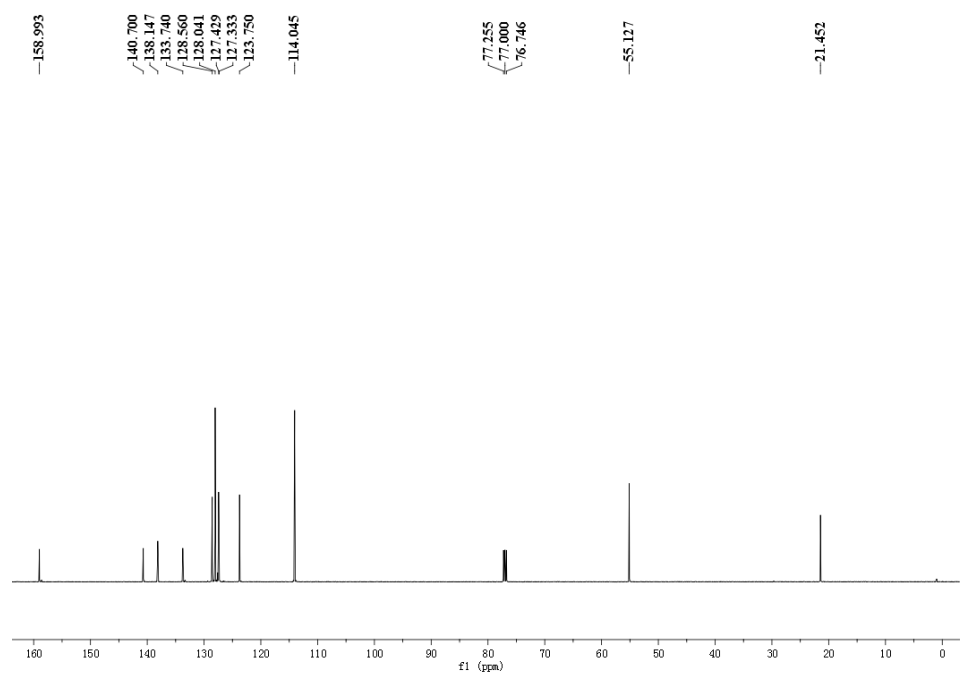

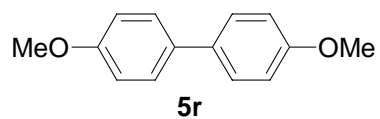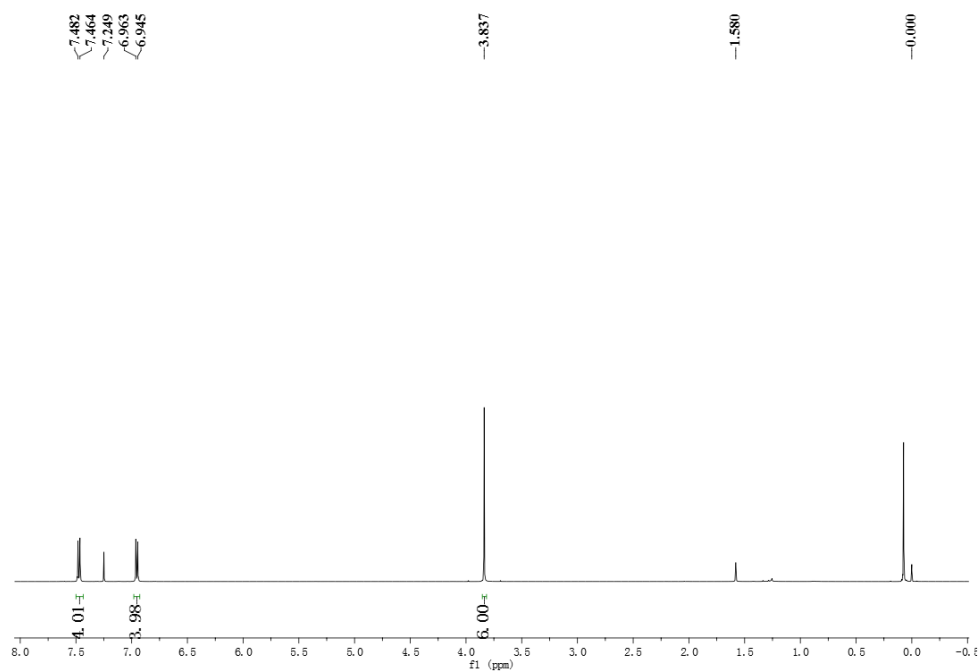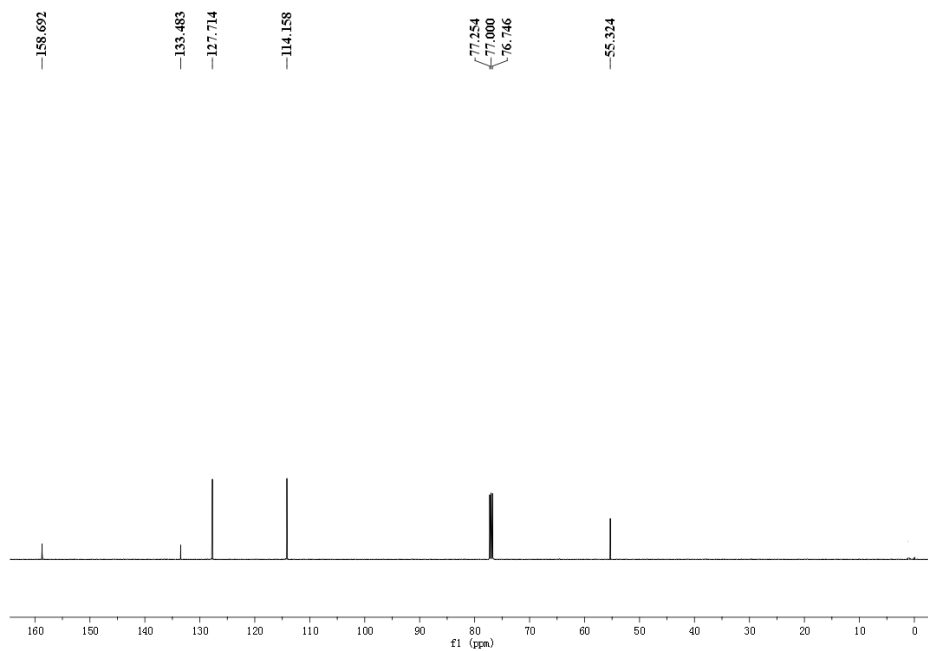

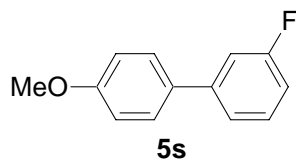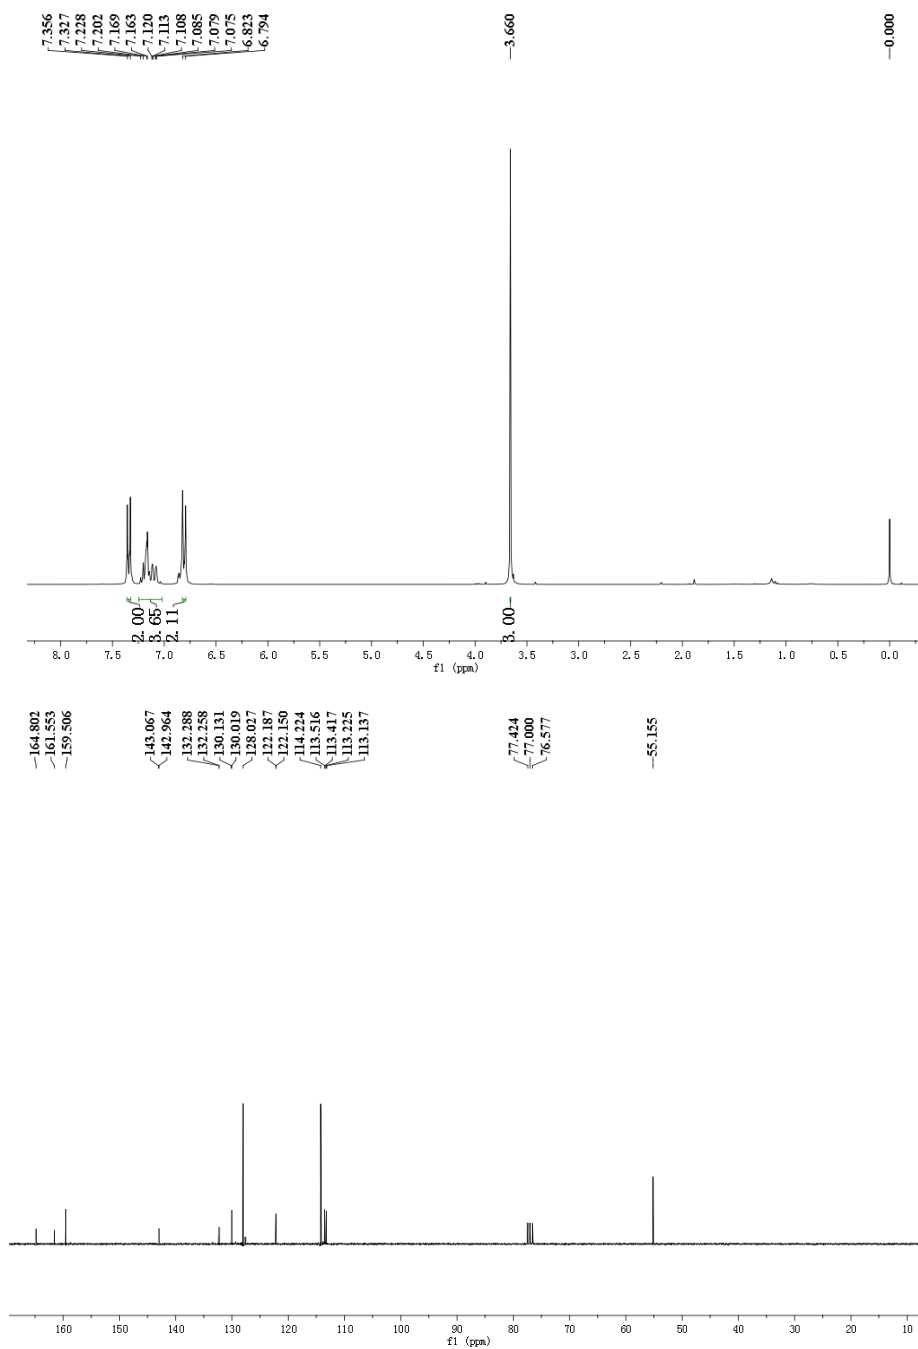

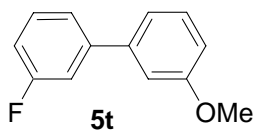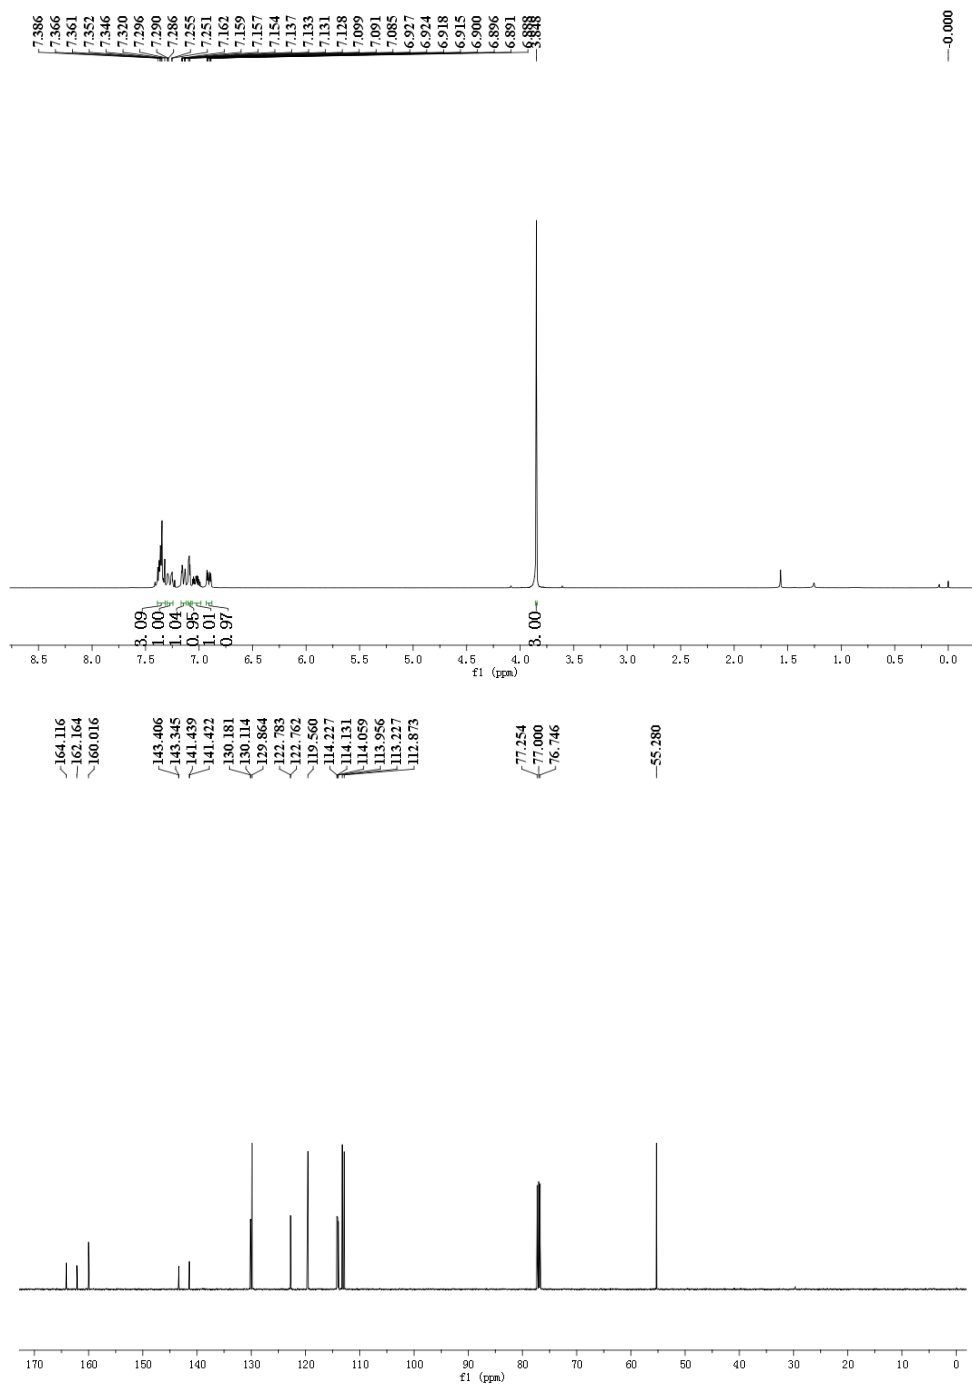

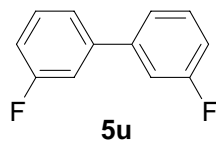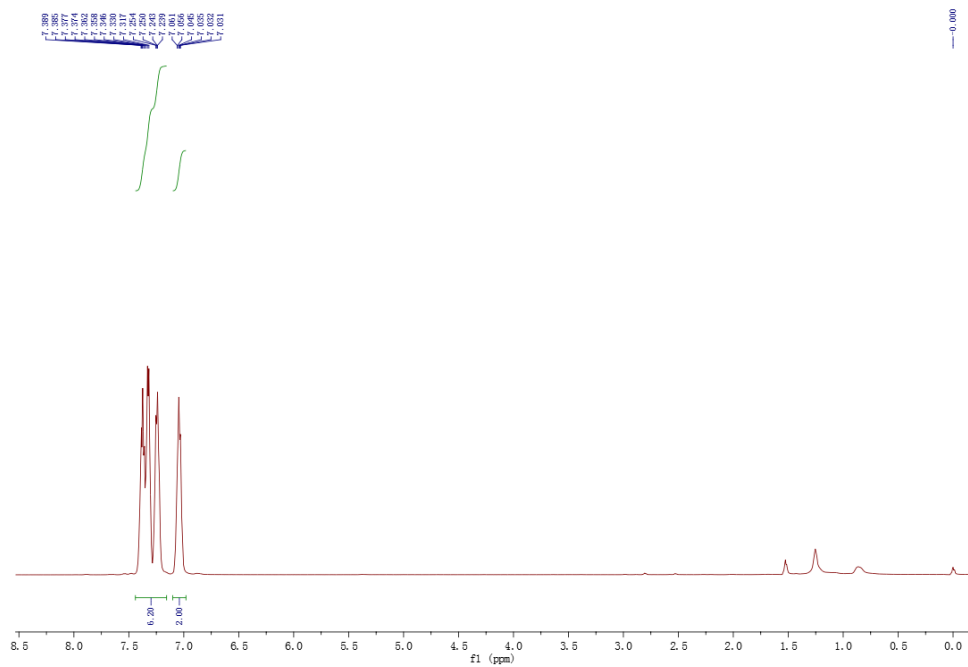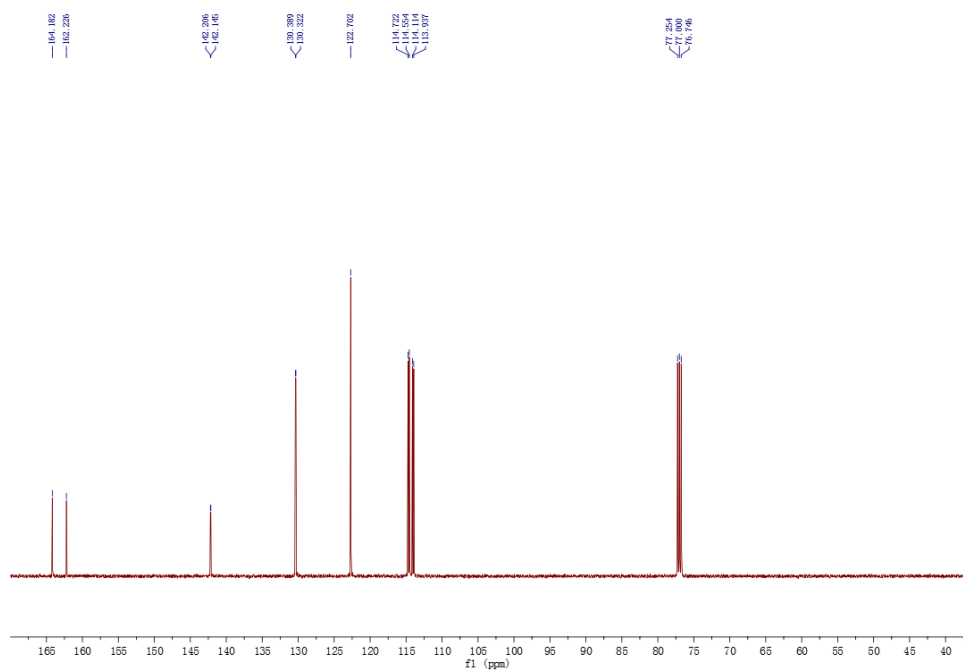



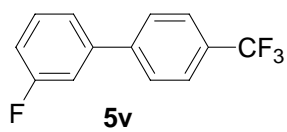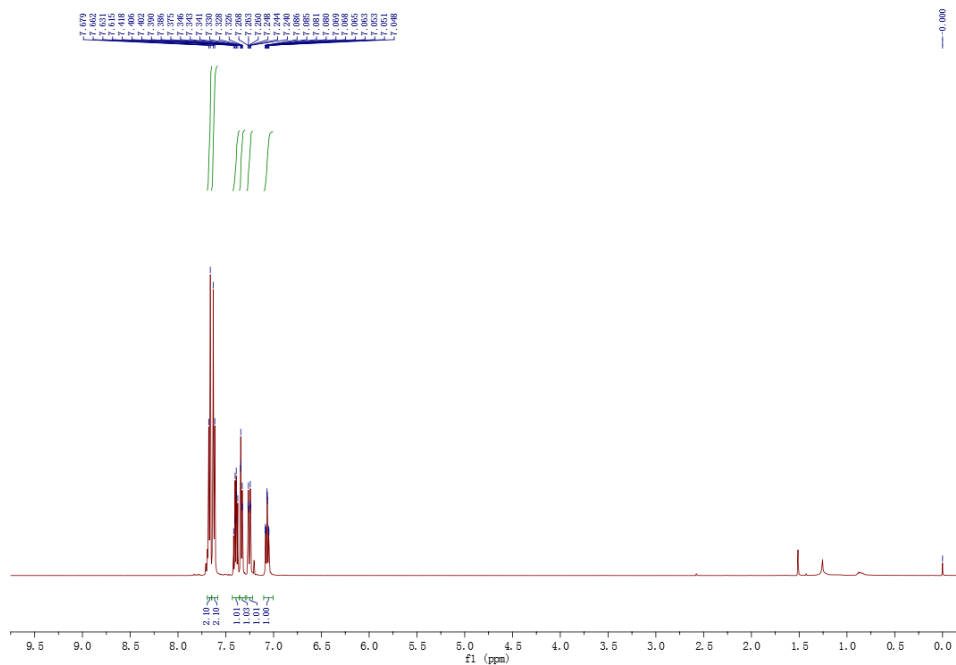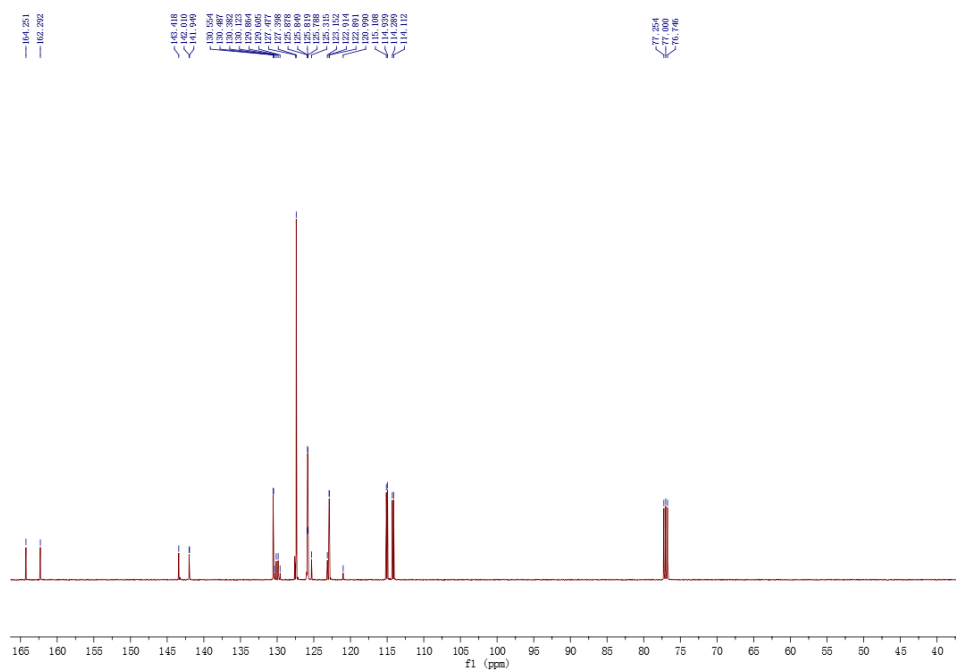

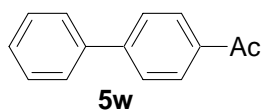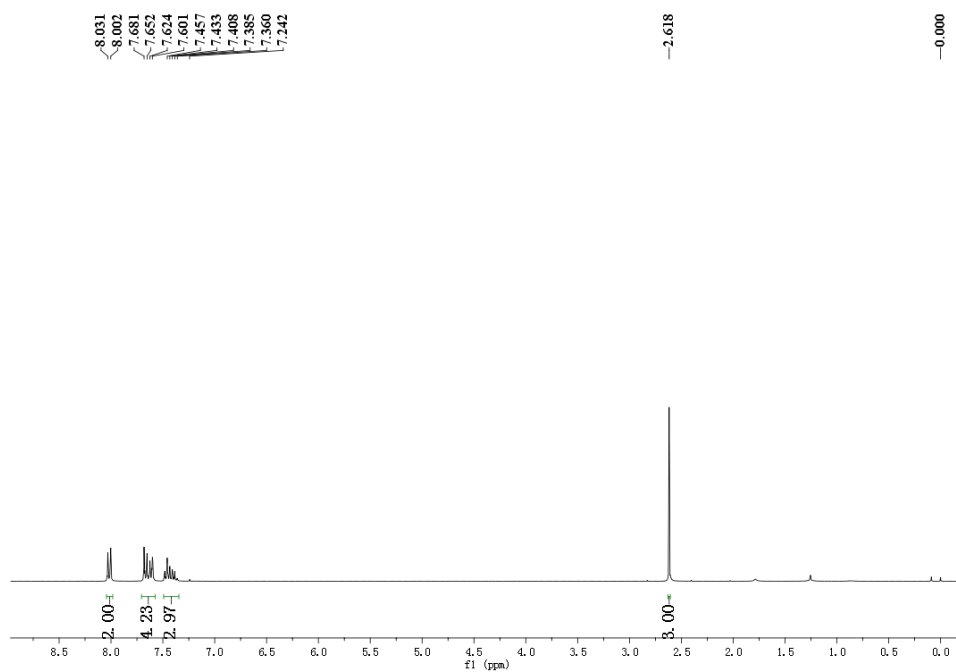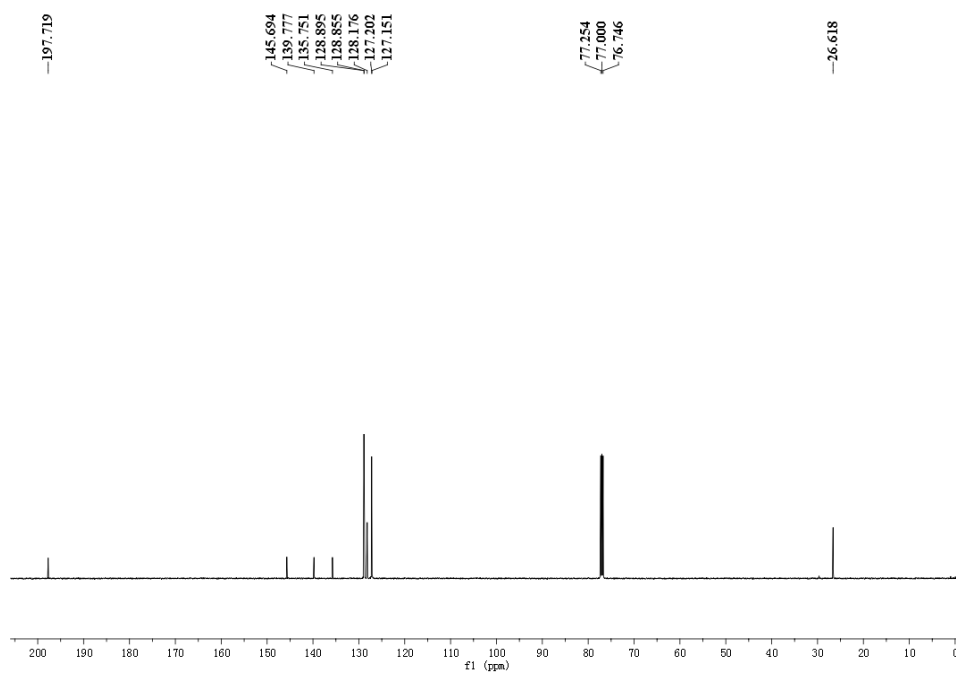

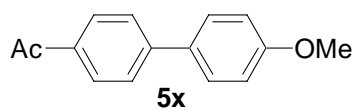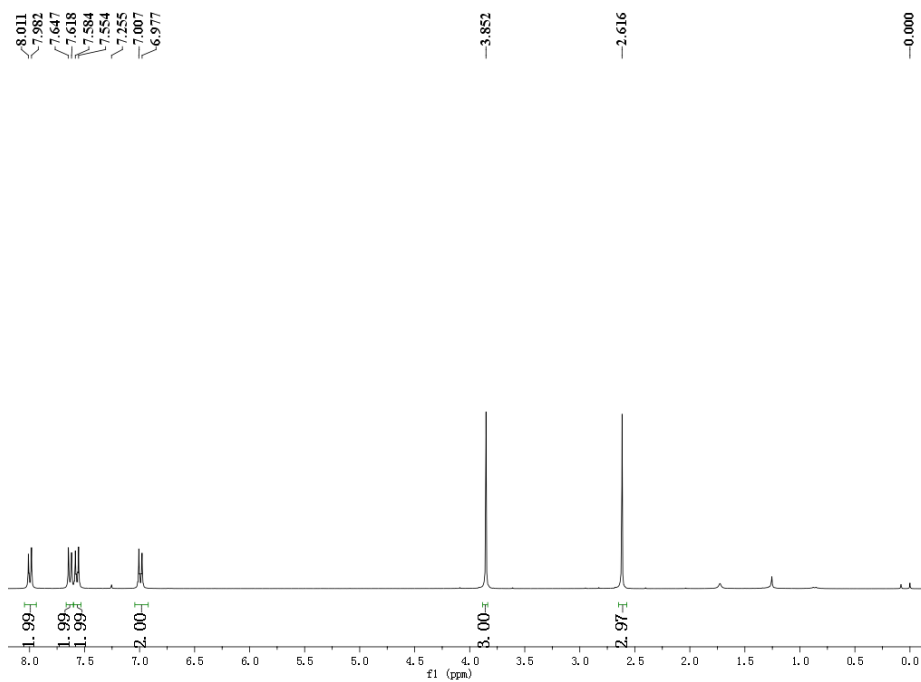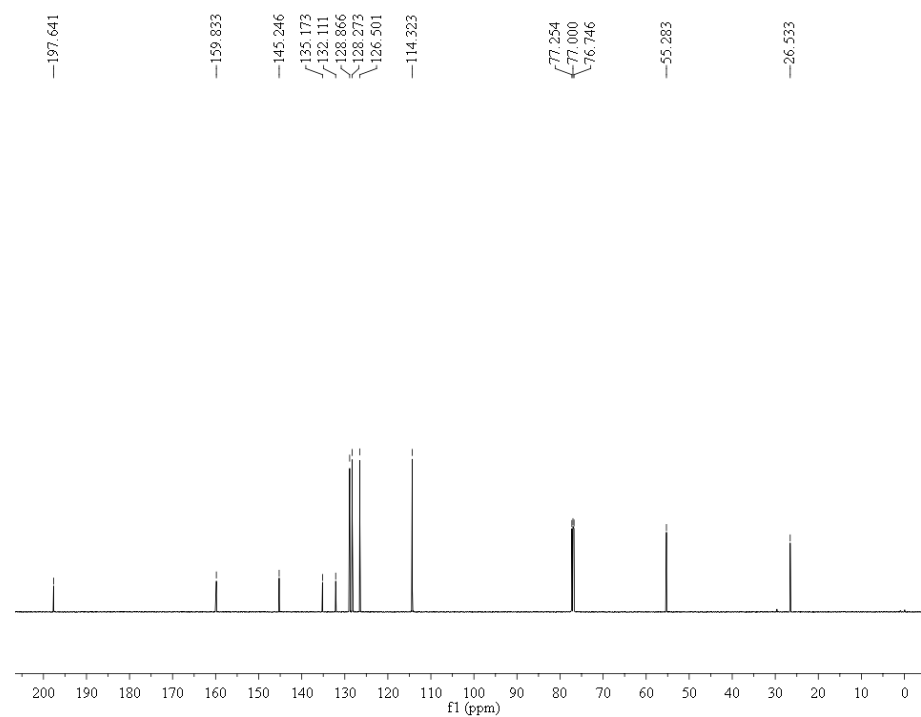

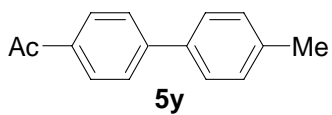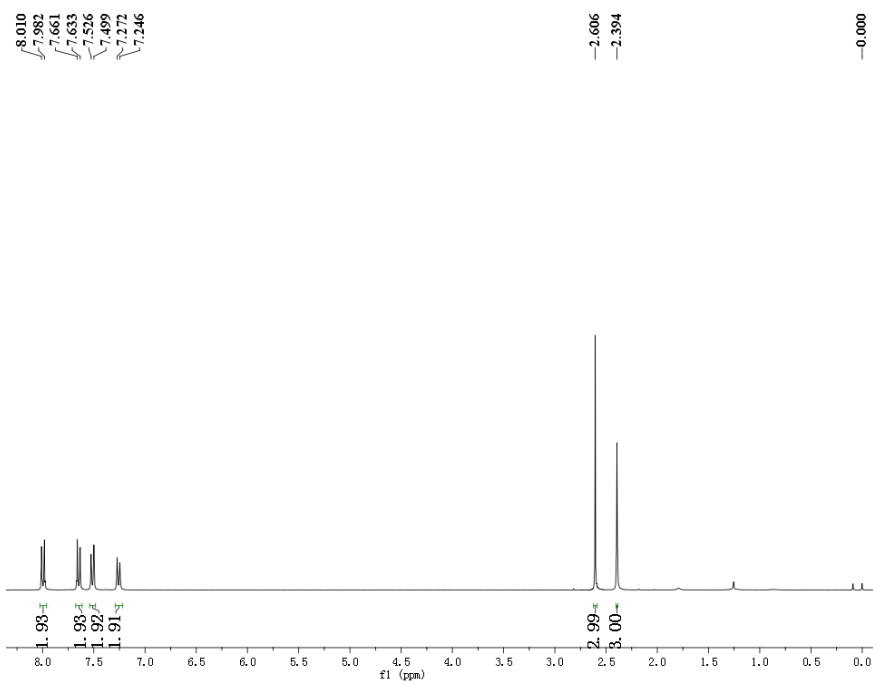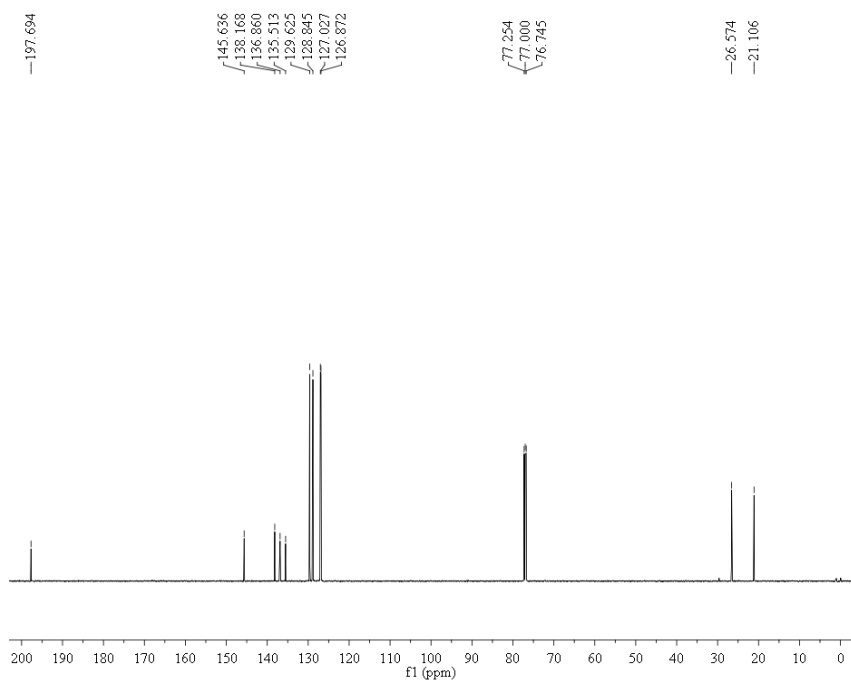

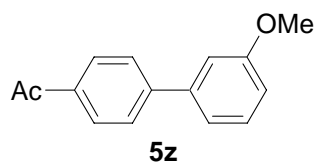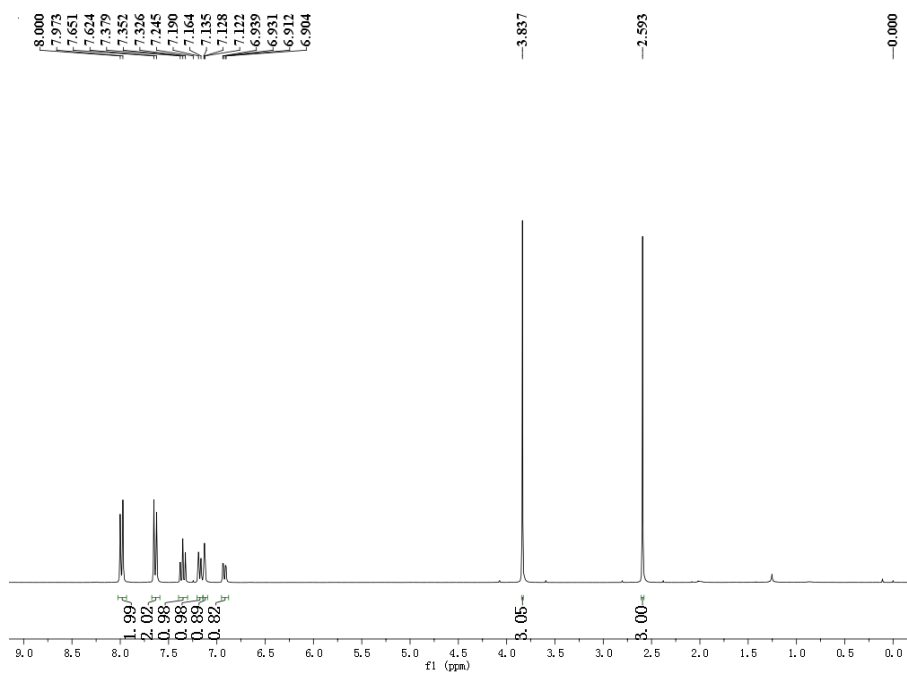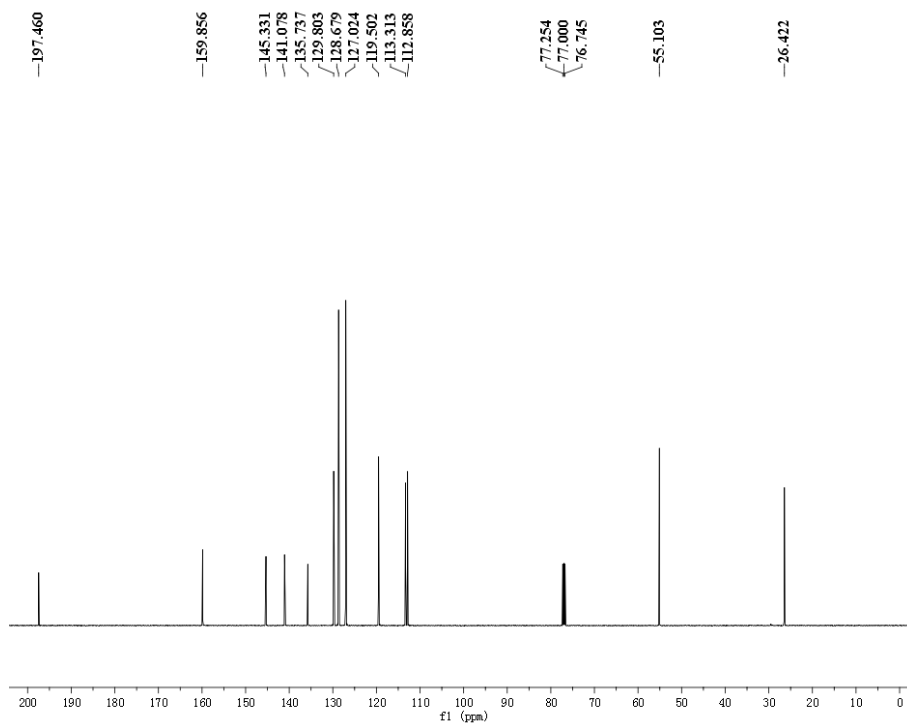

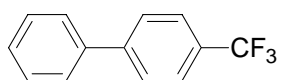

5aa

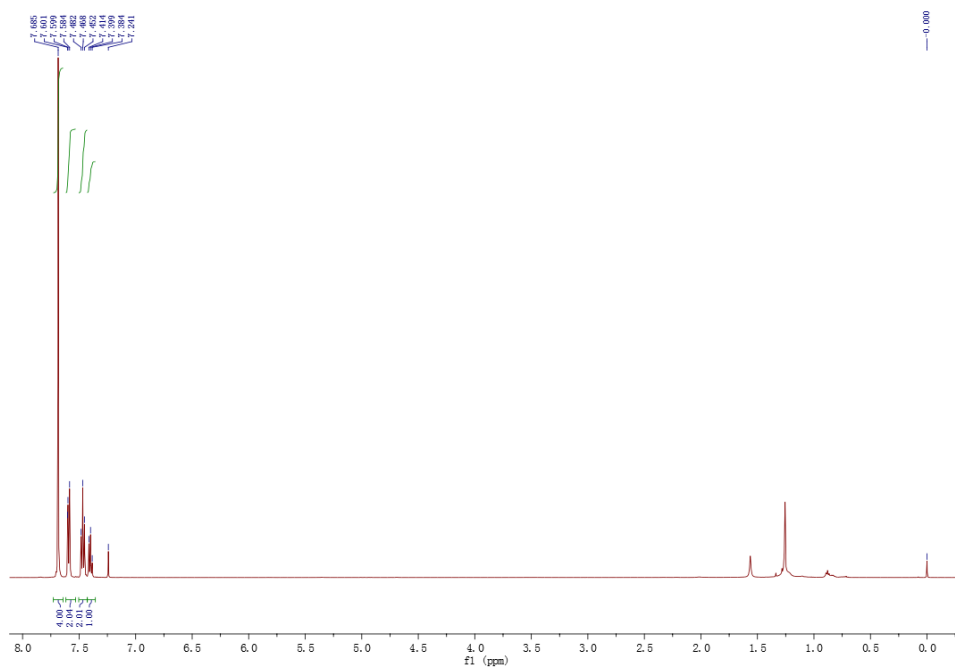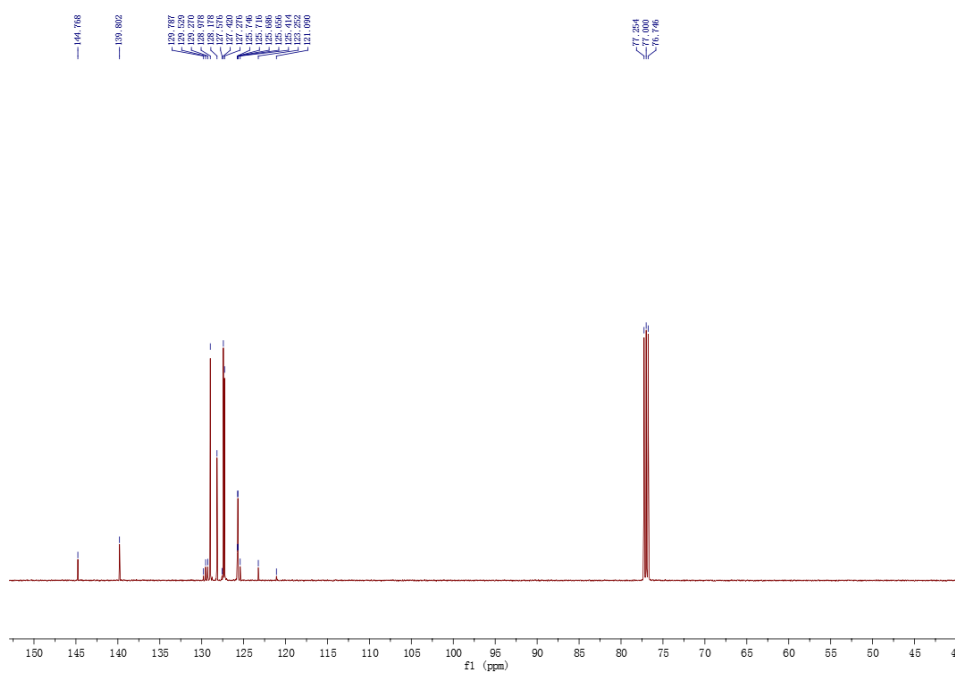

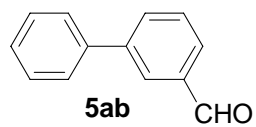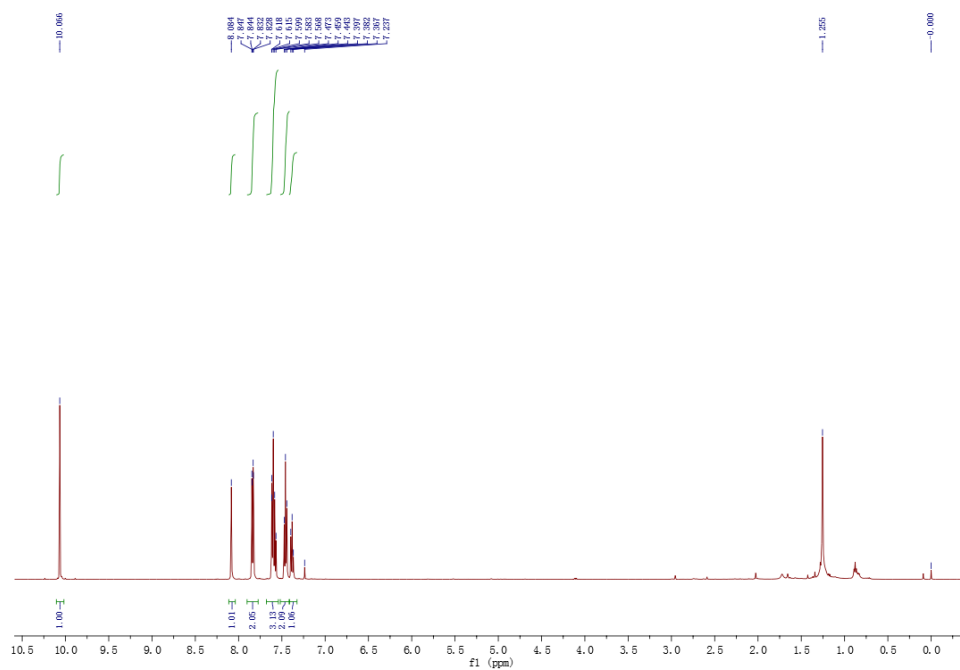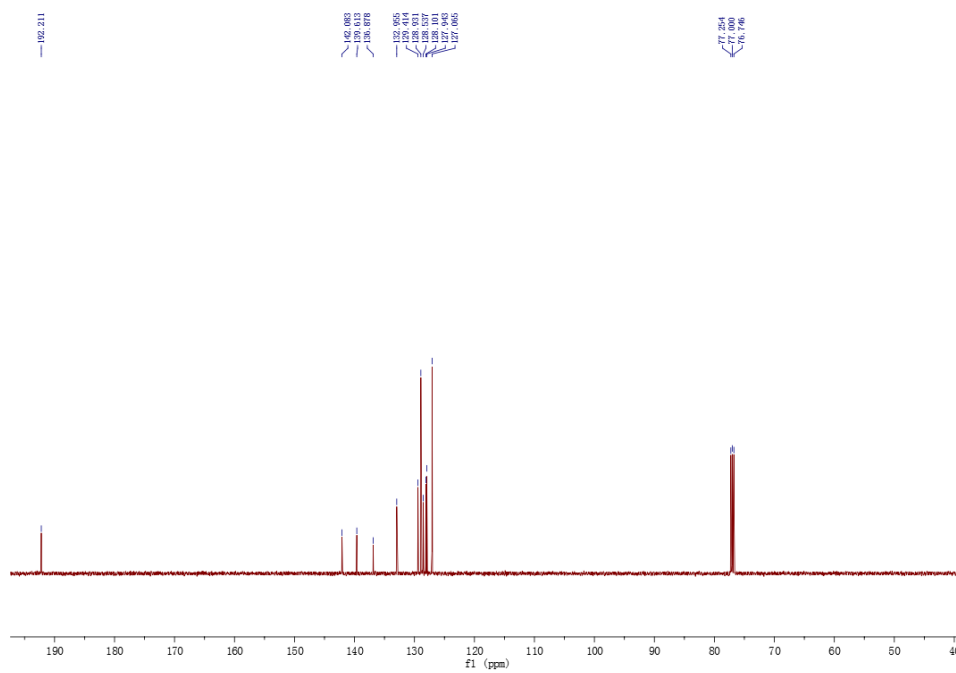

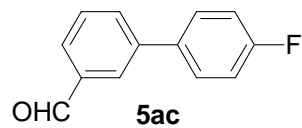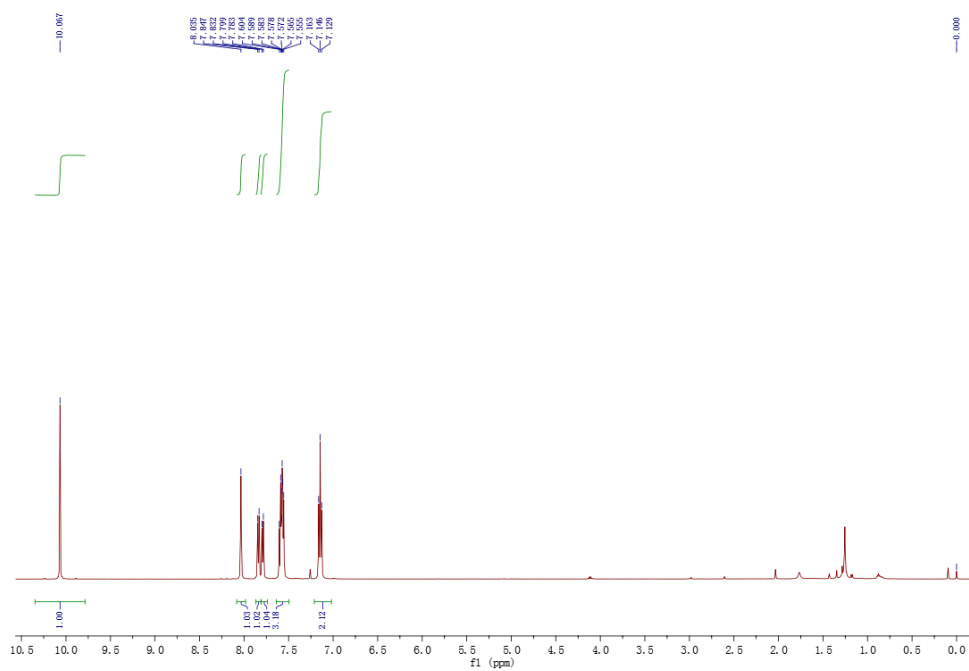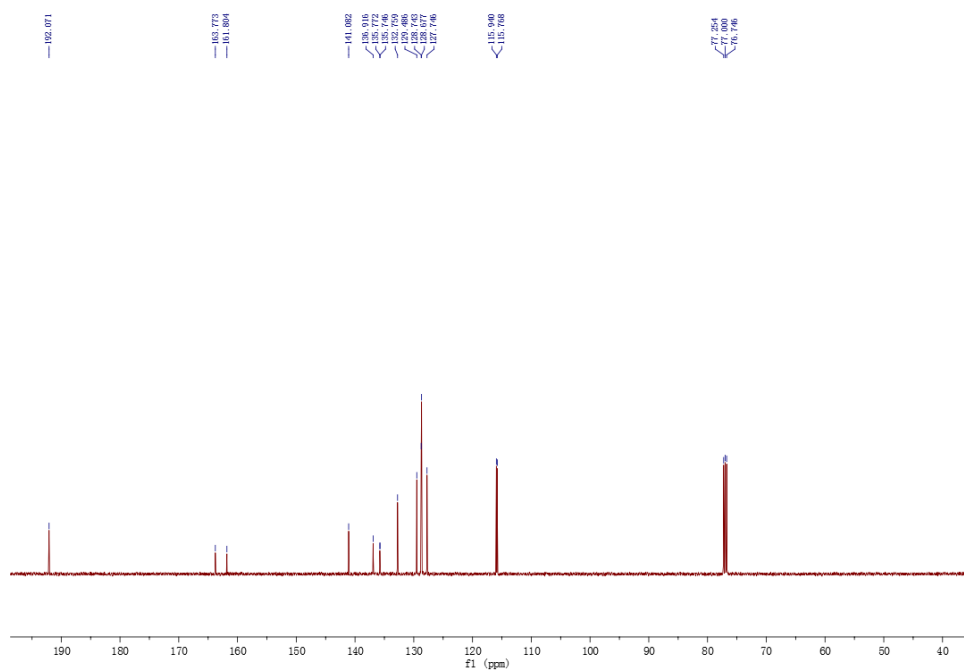



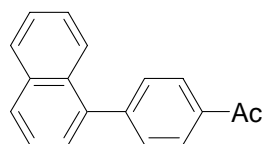

5ad

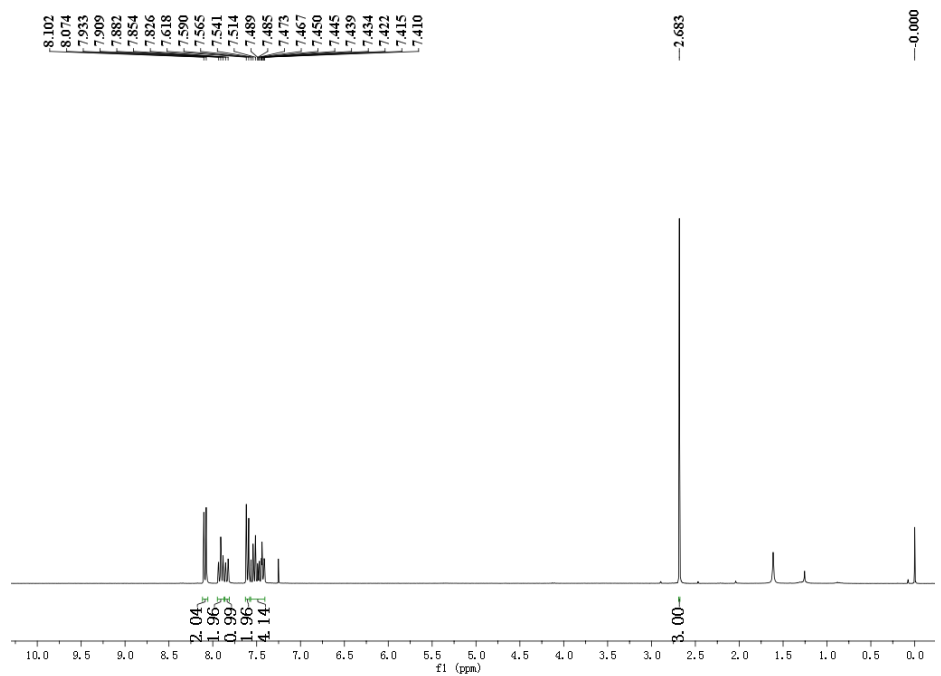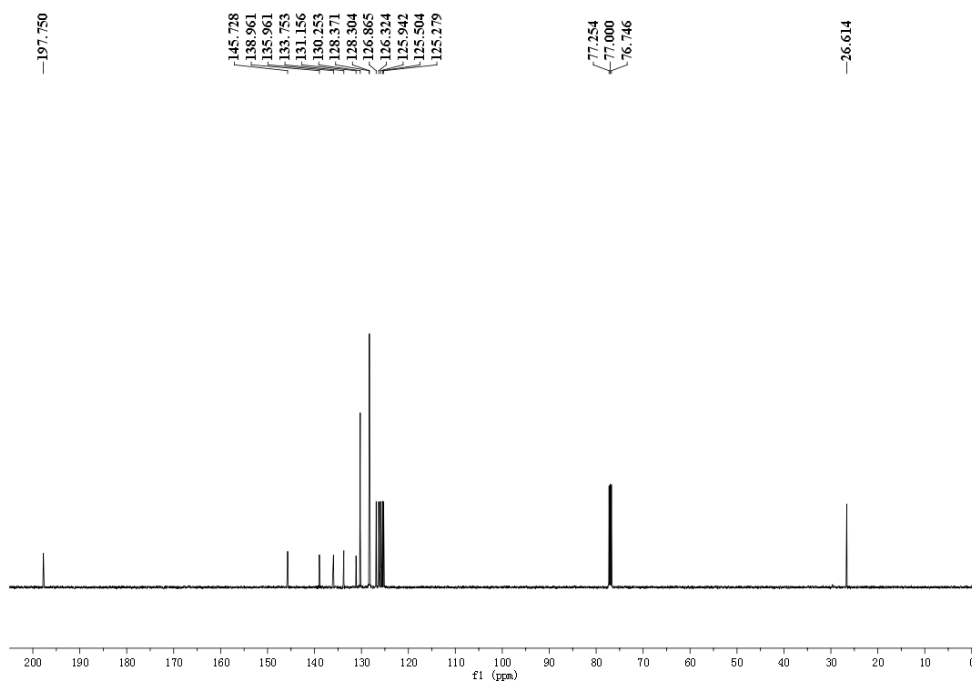

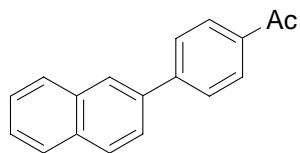

5ae

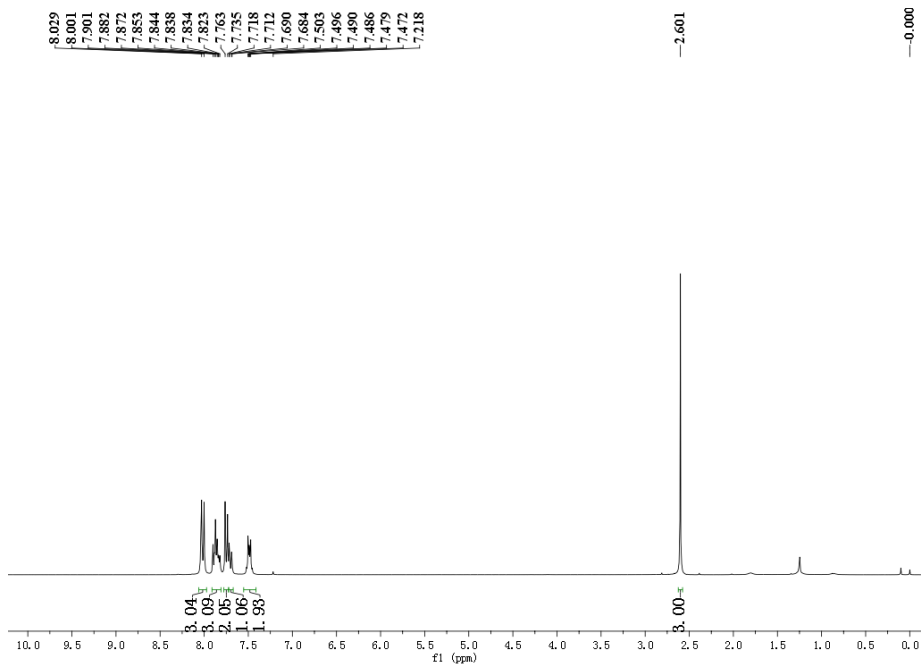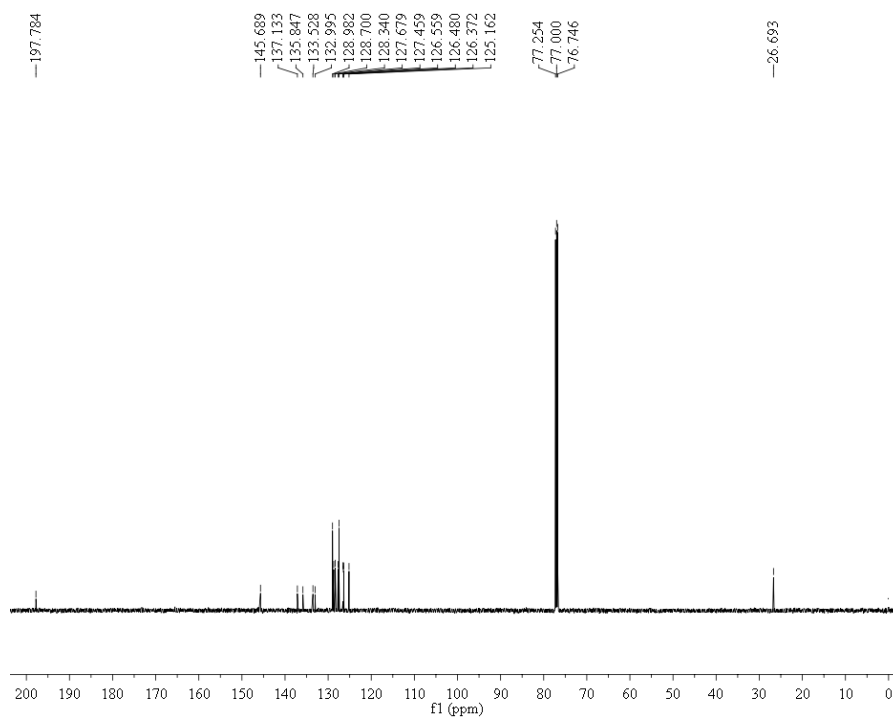

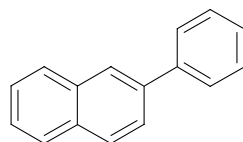

**5af**

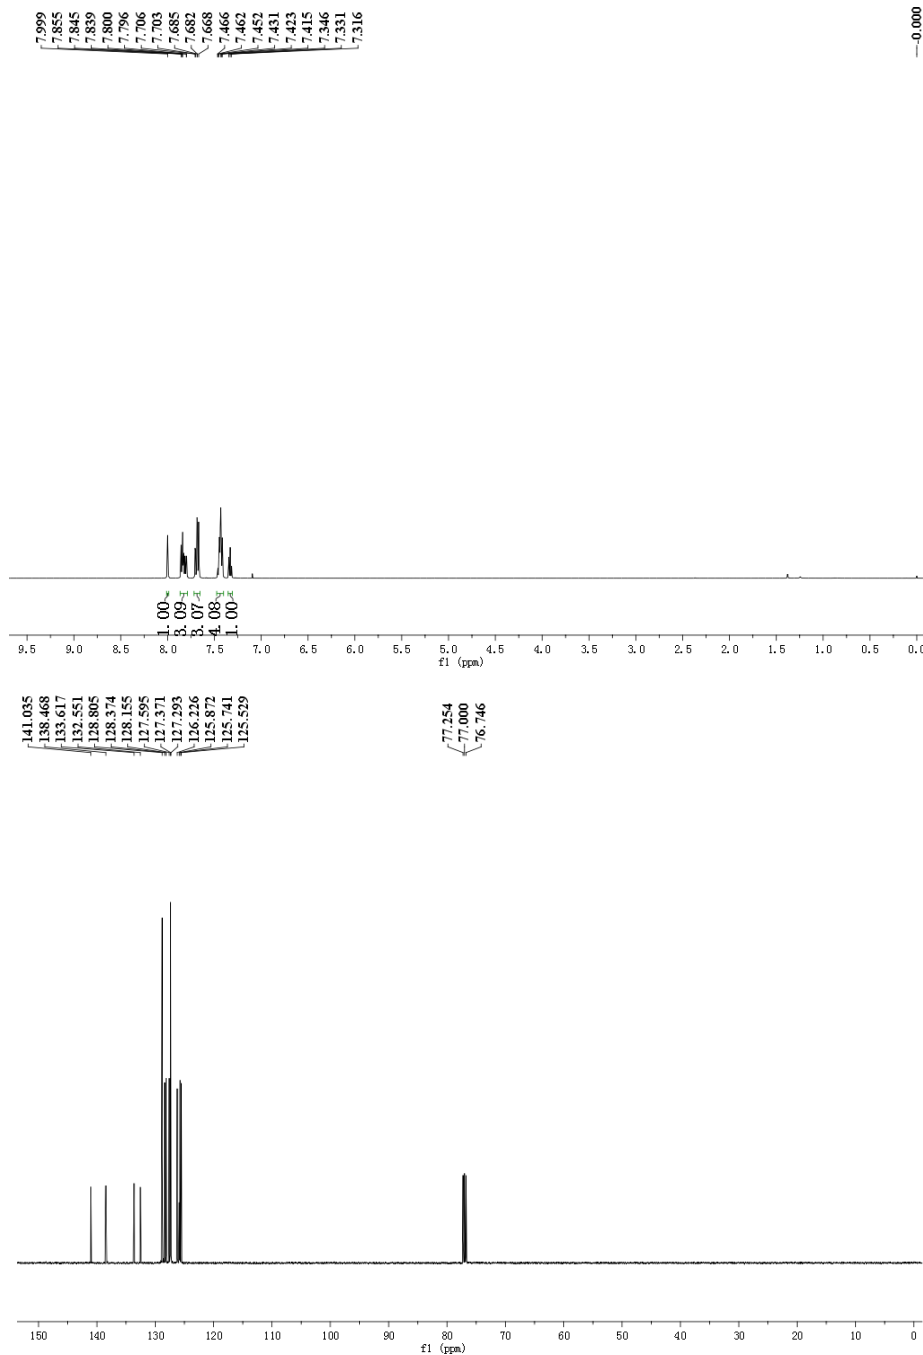

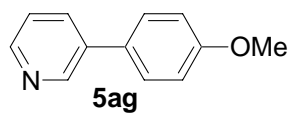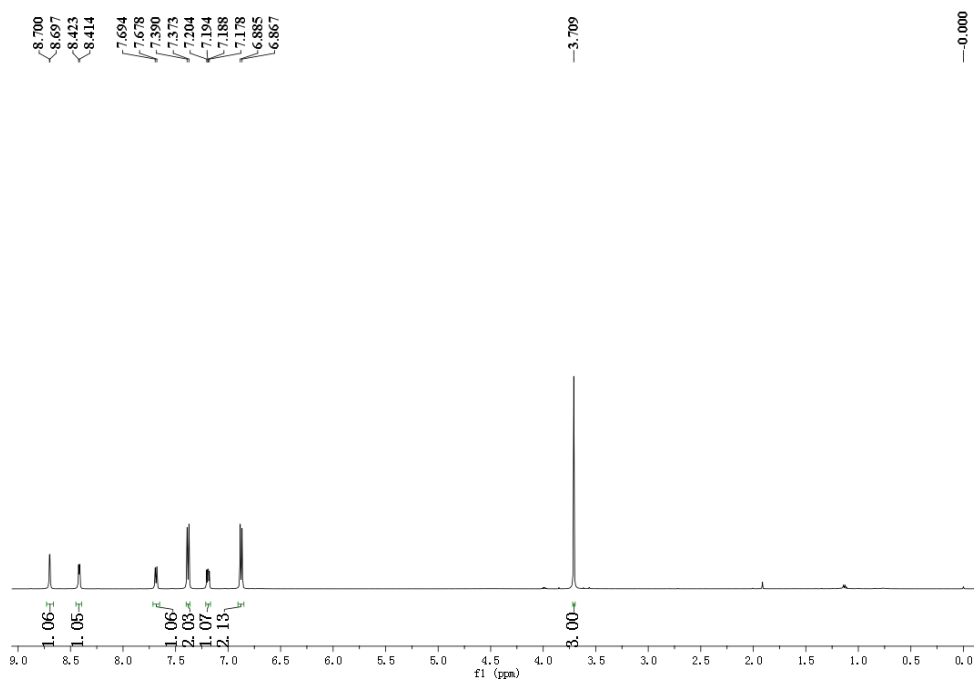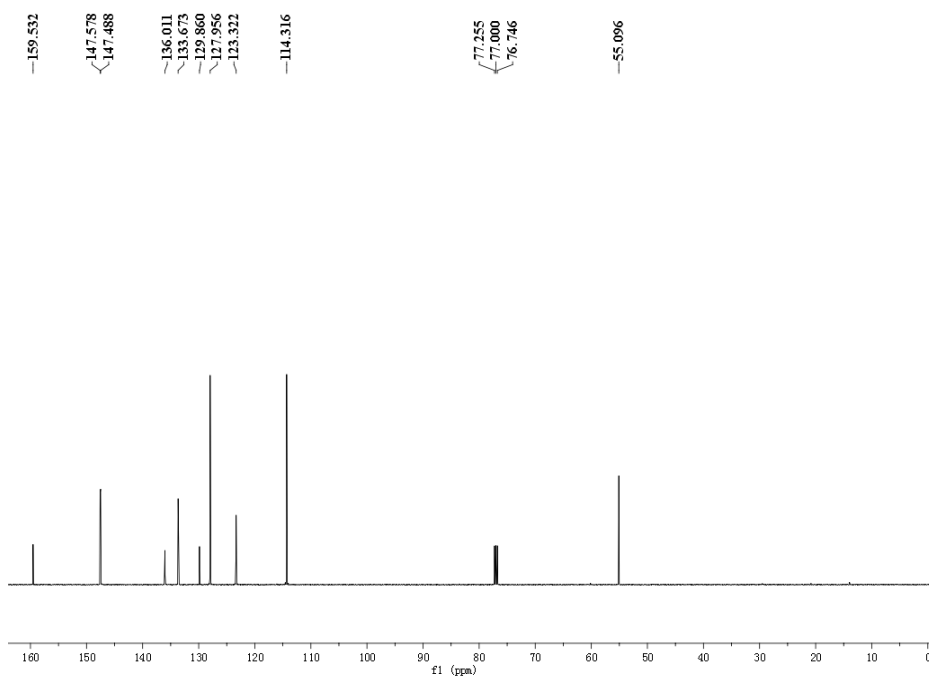

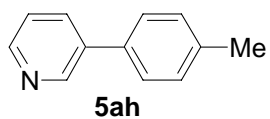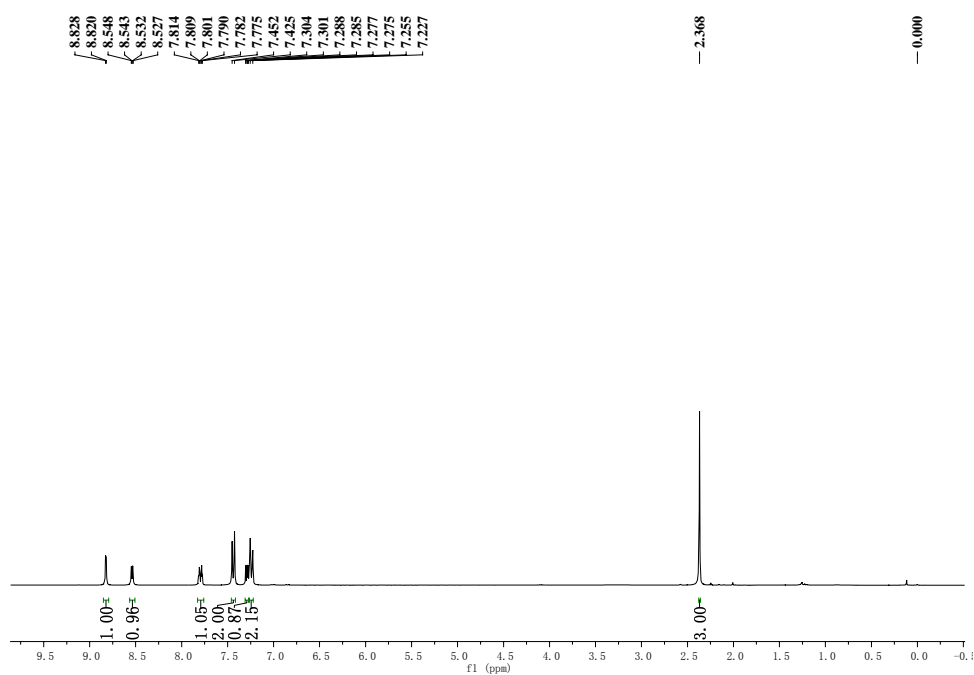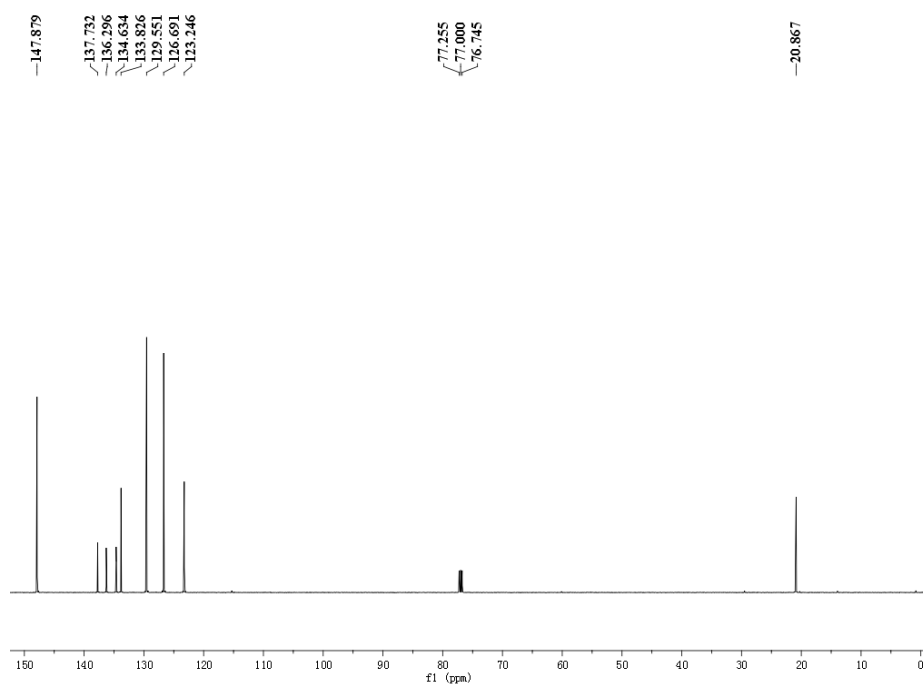

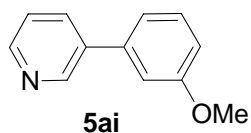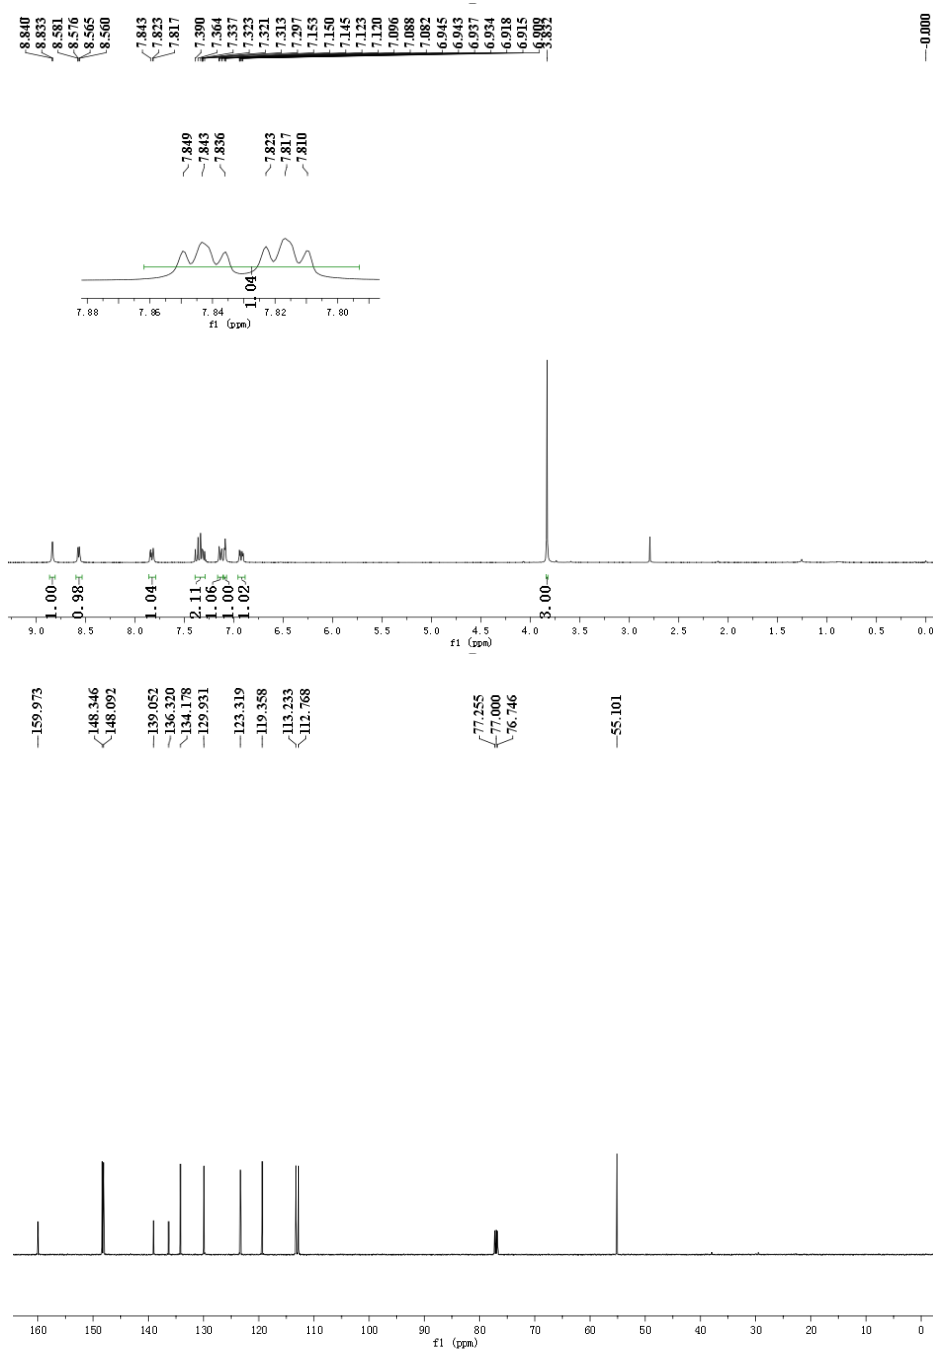

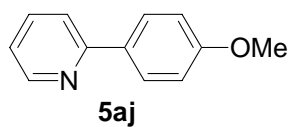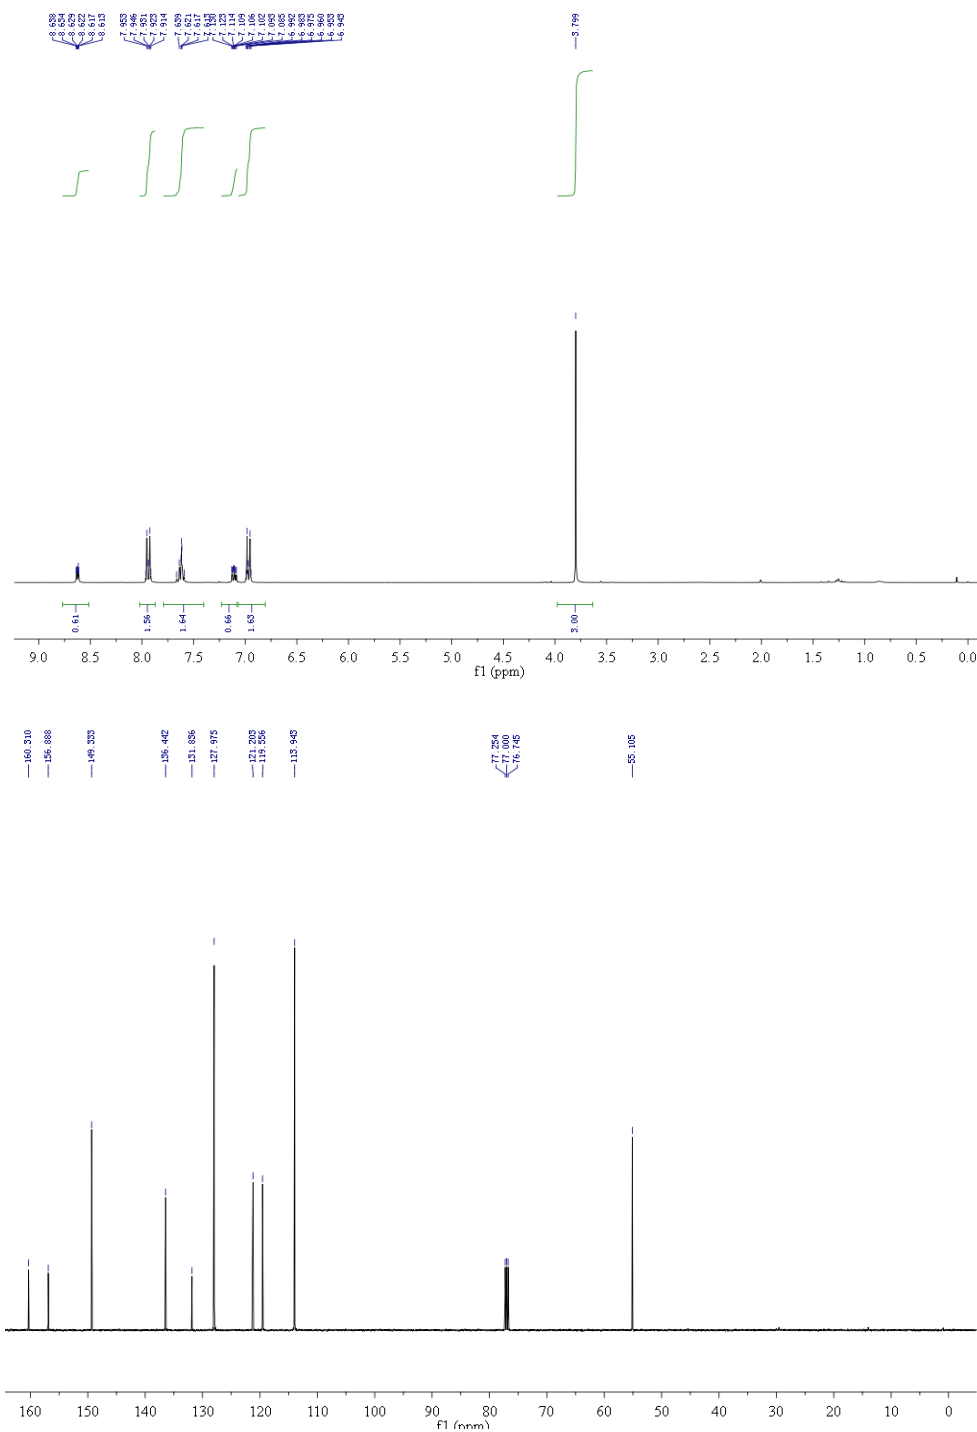

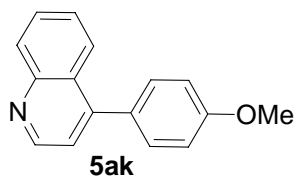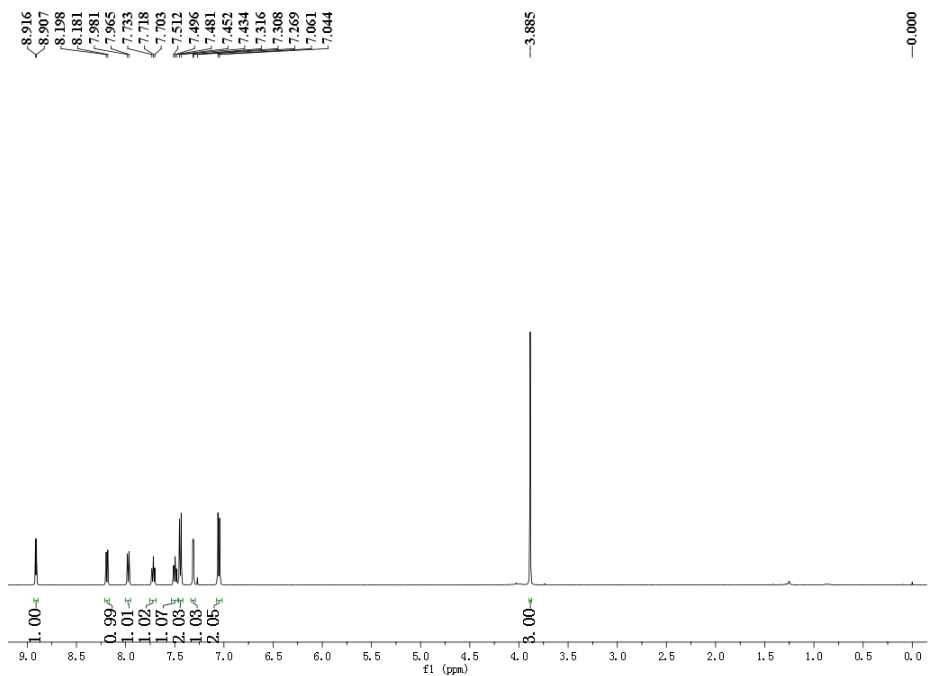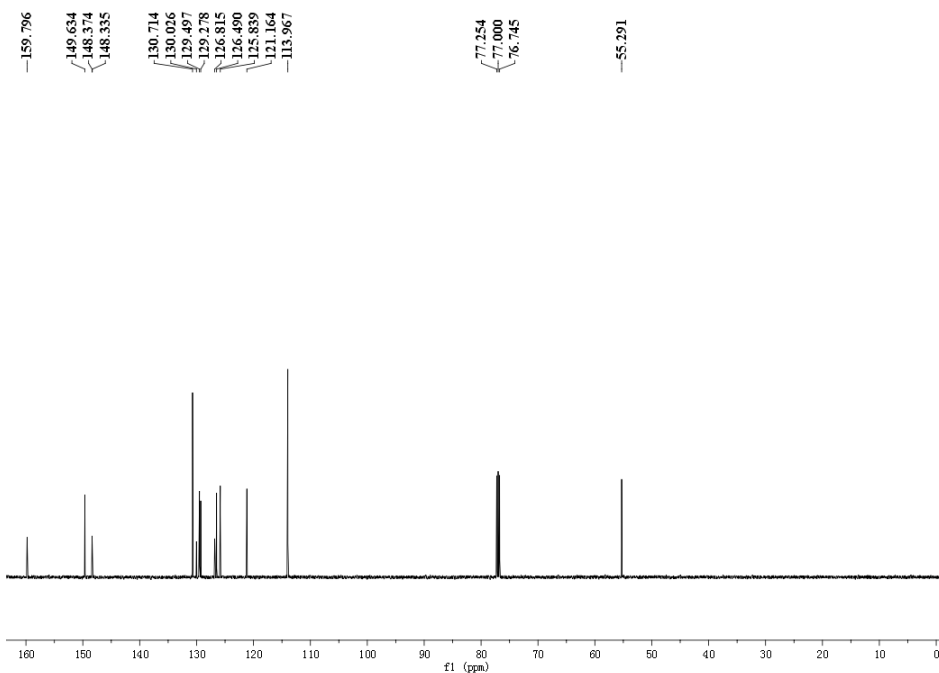



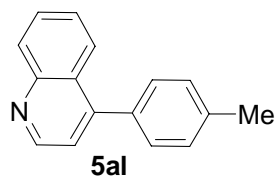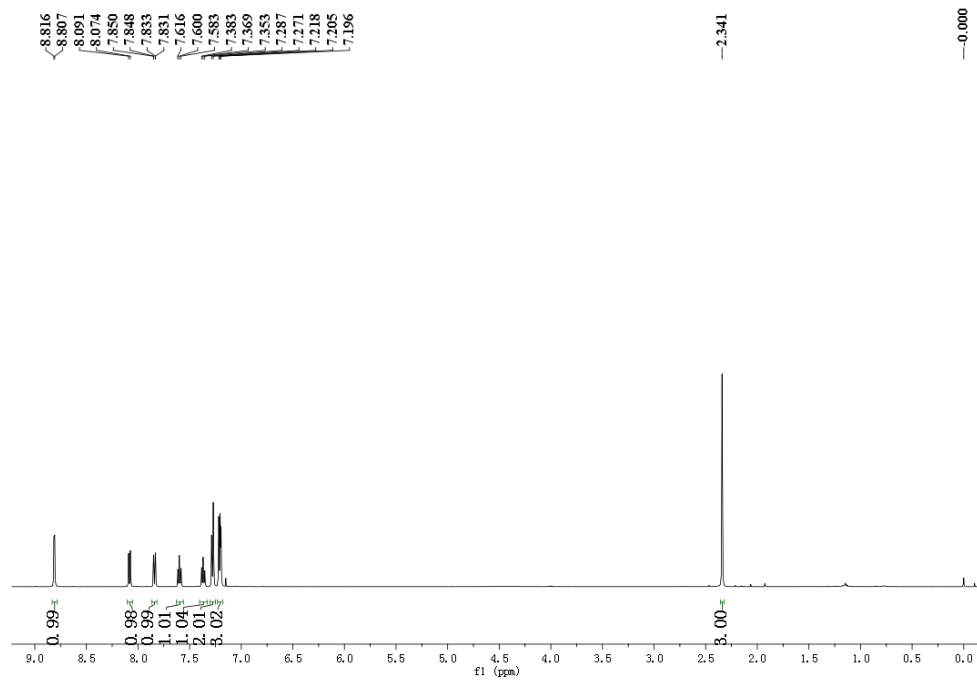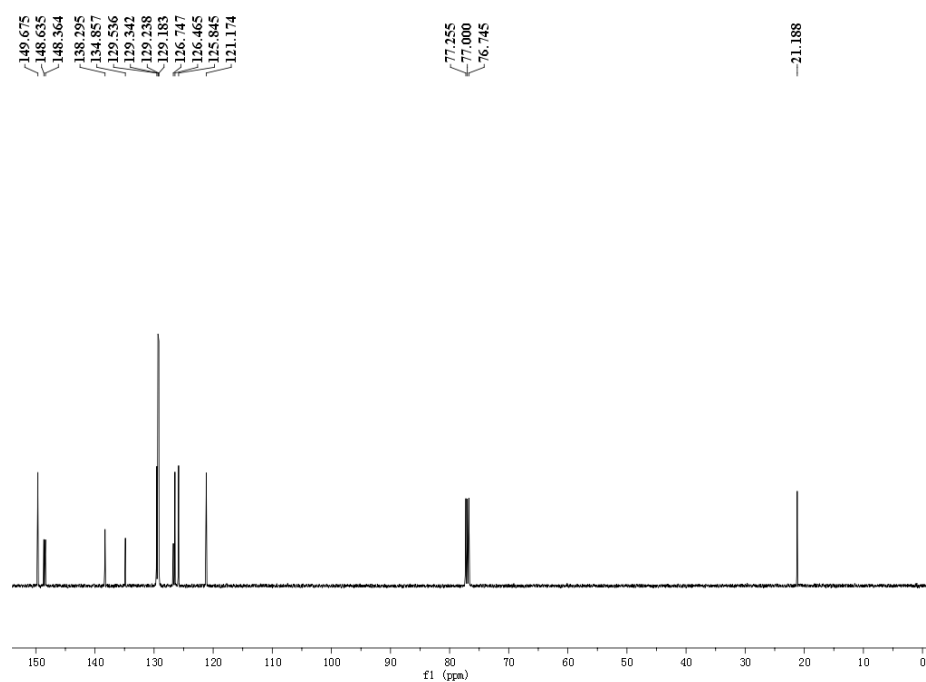

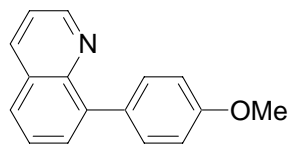

5am

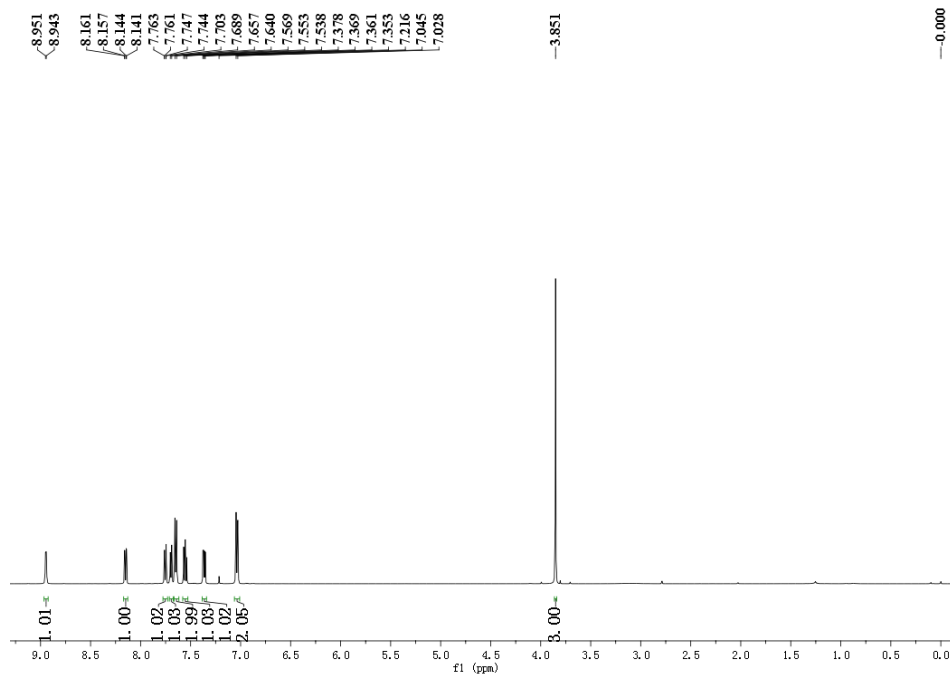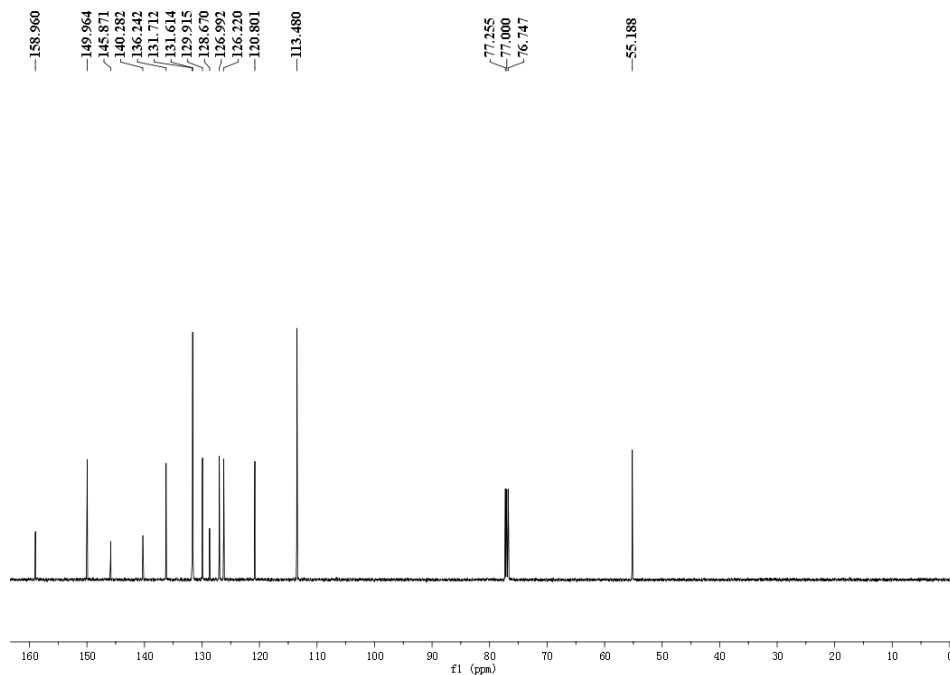

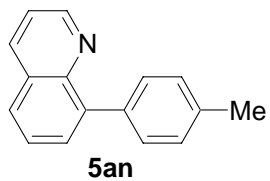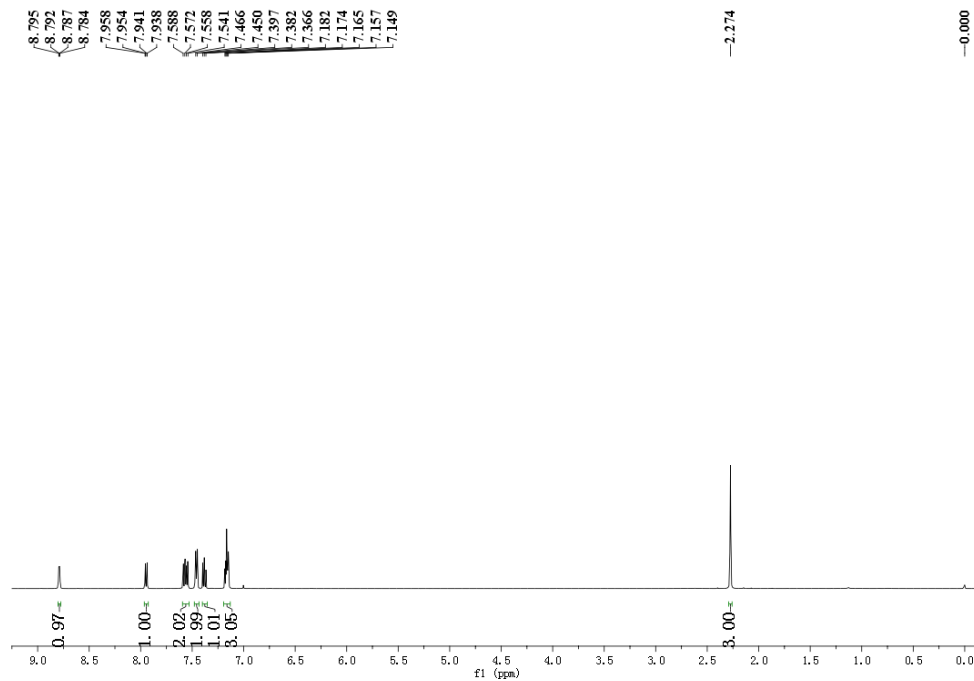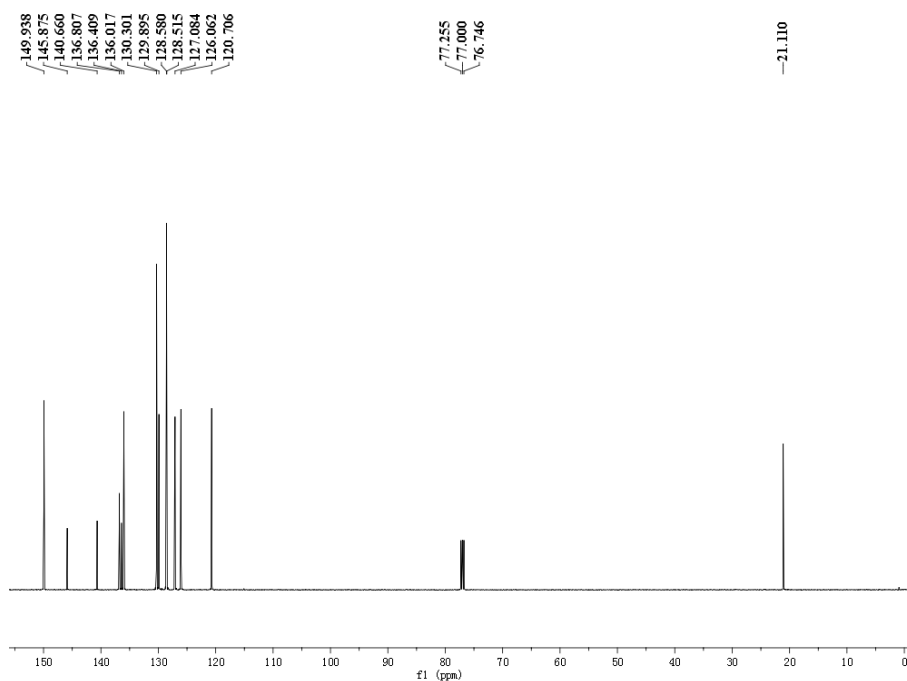

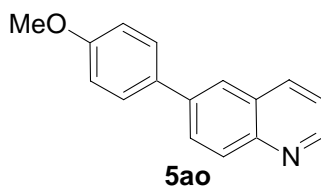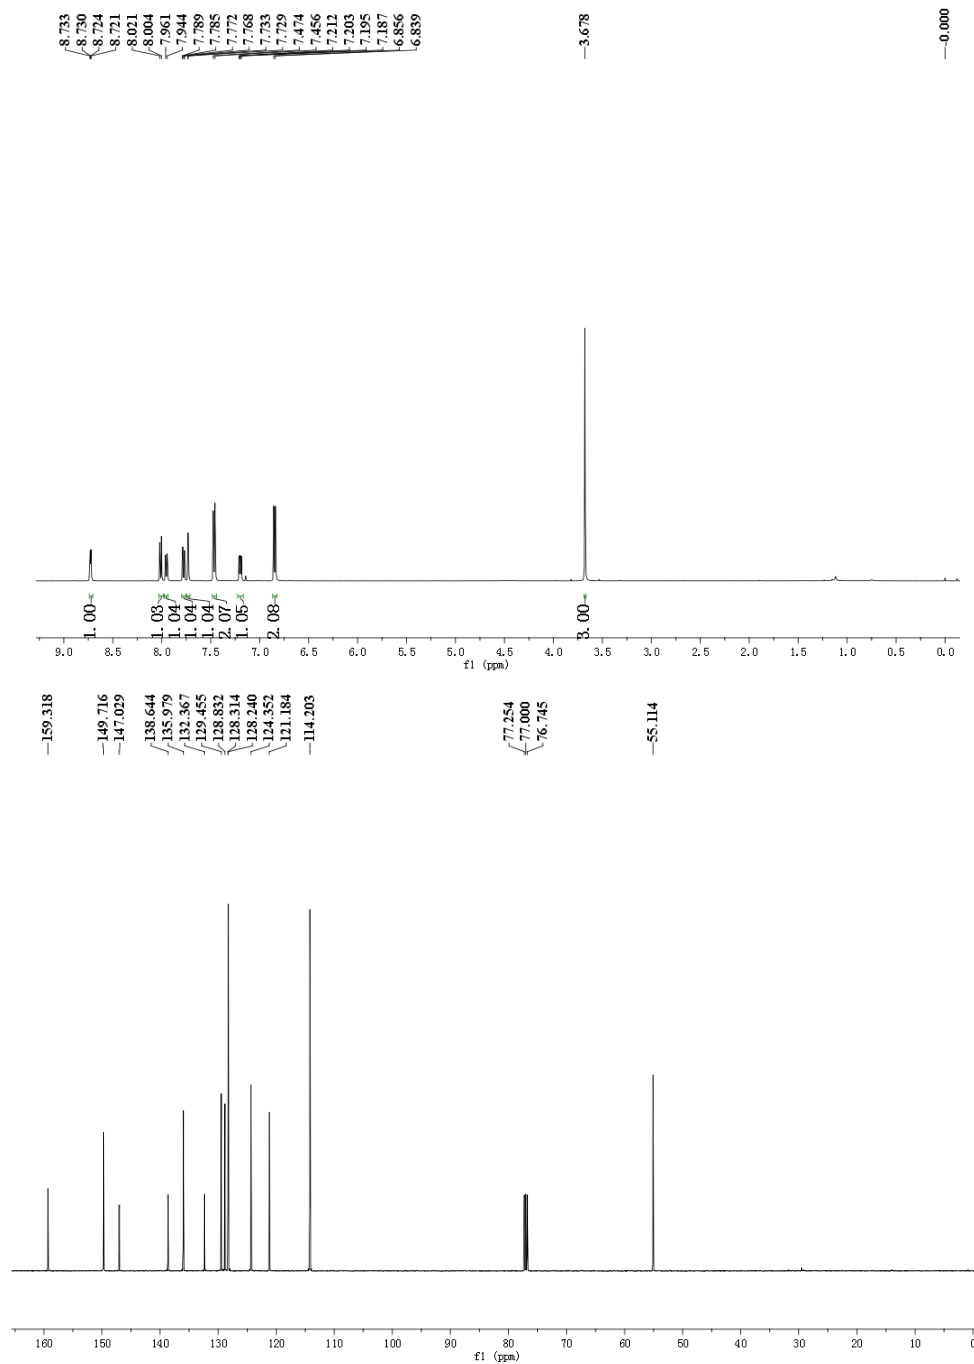

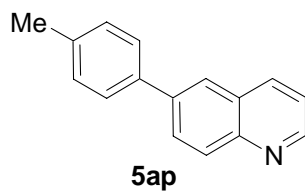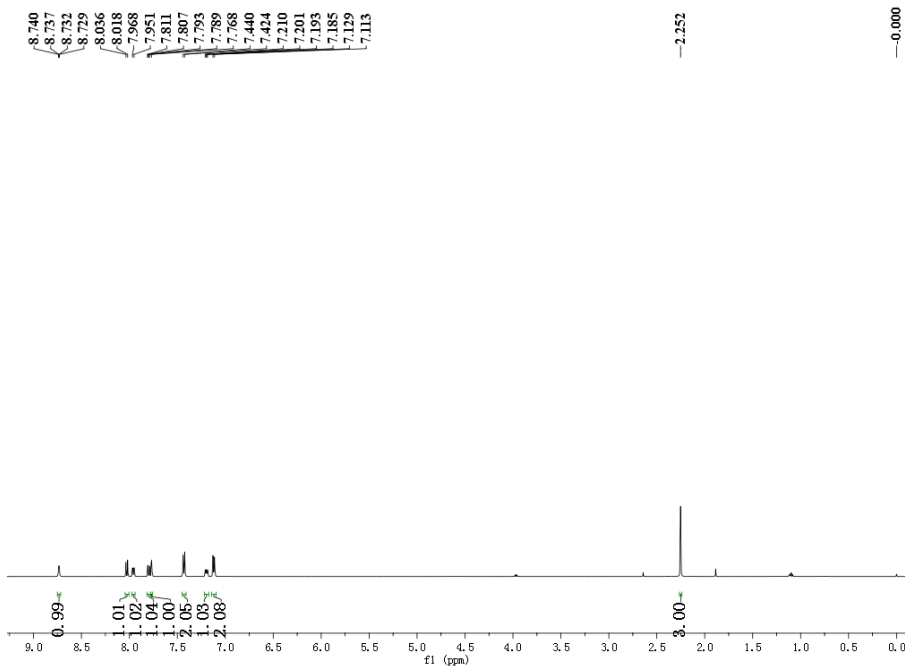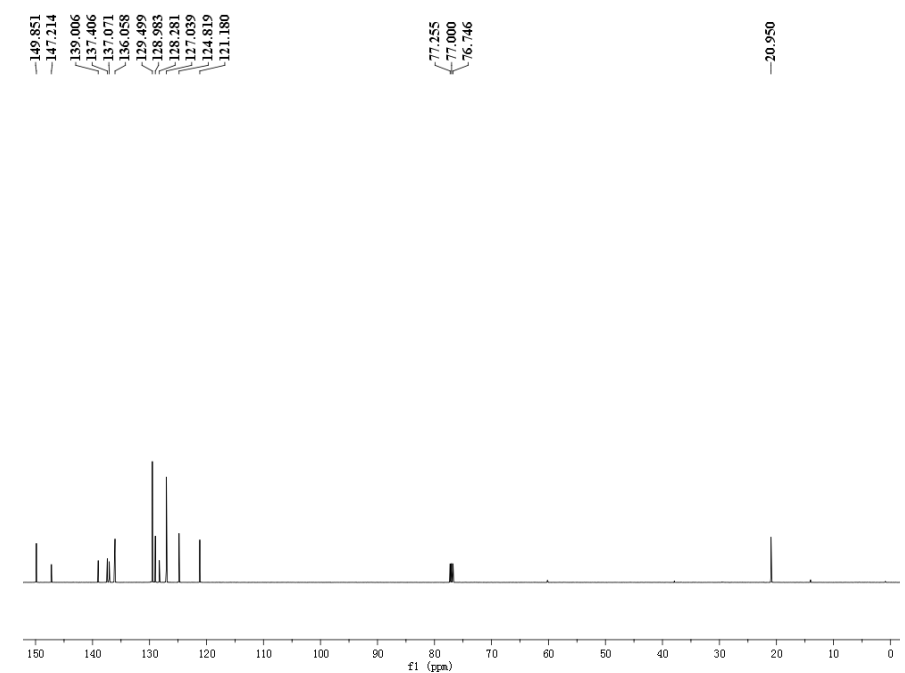

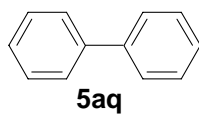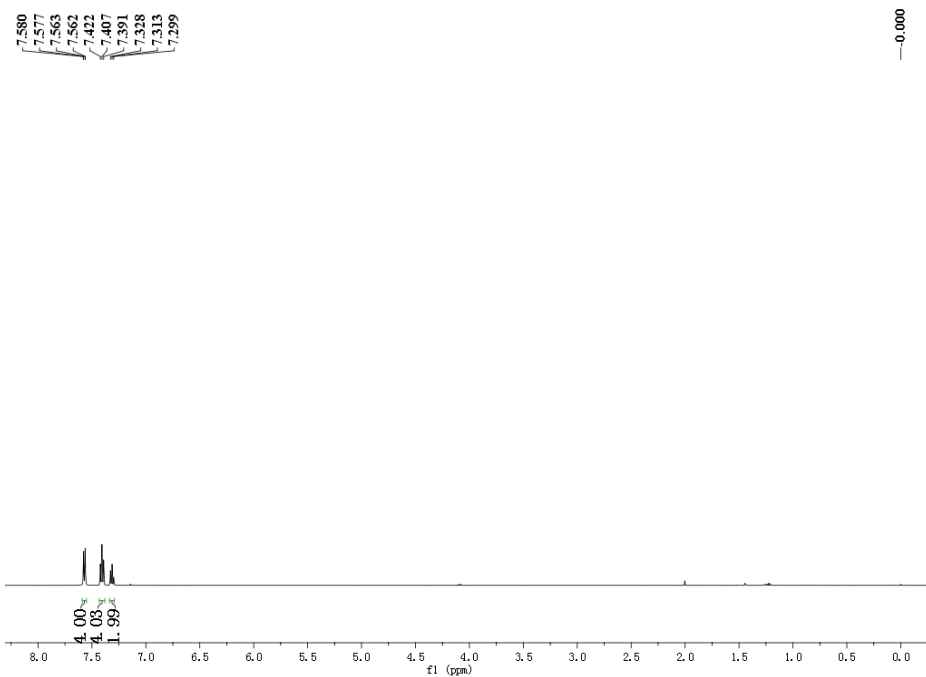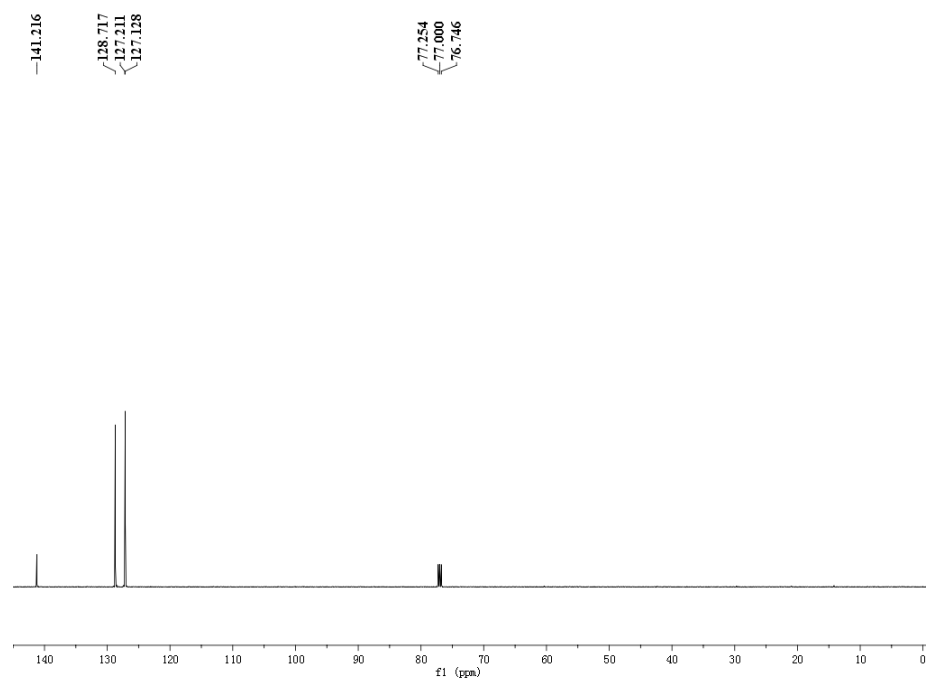

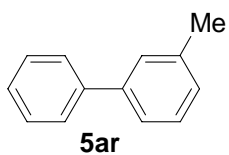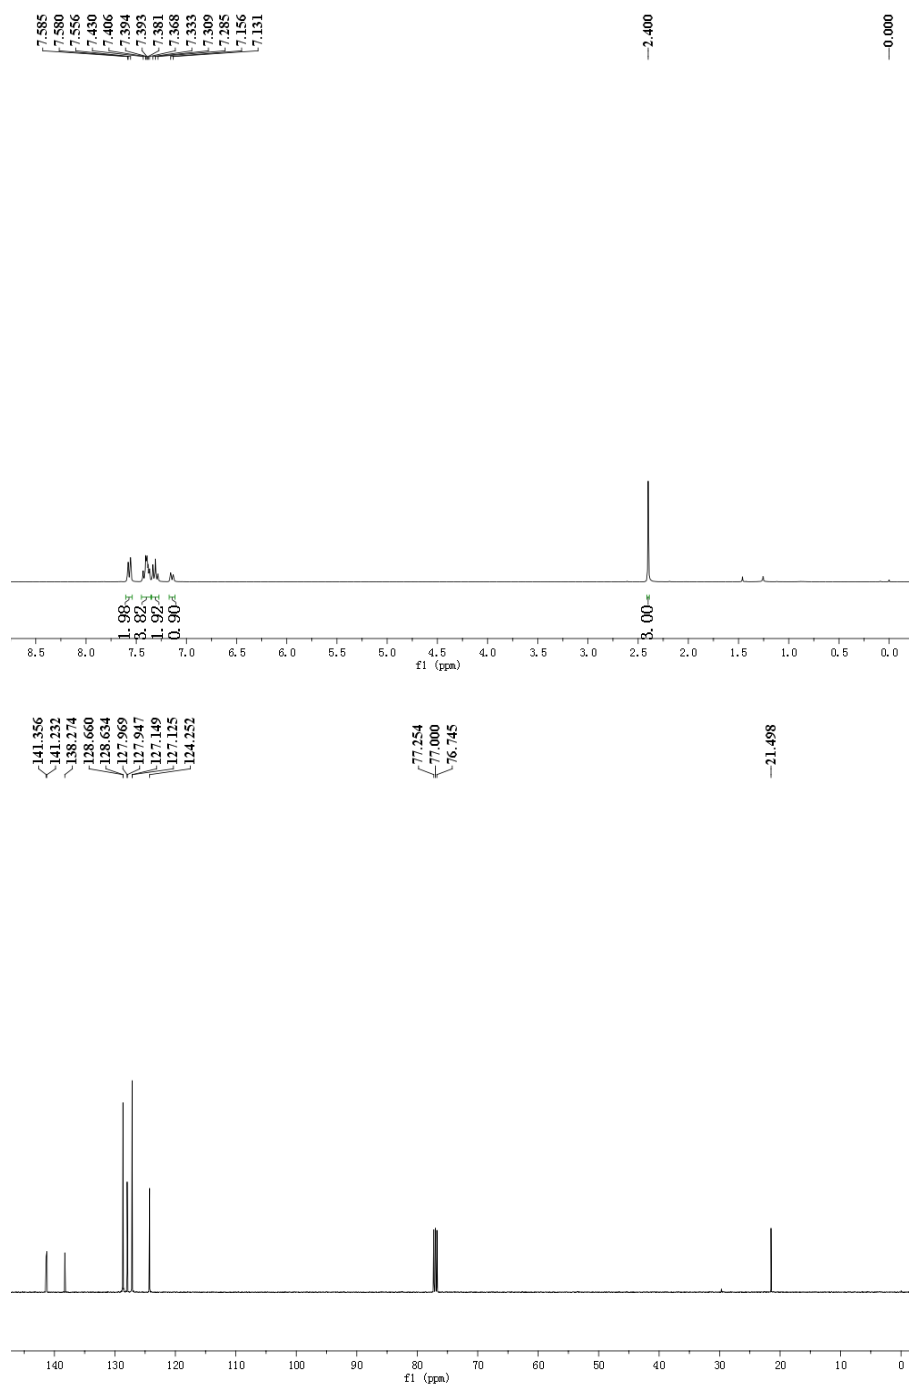

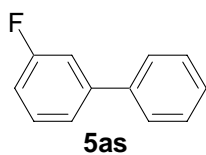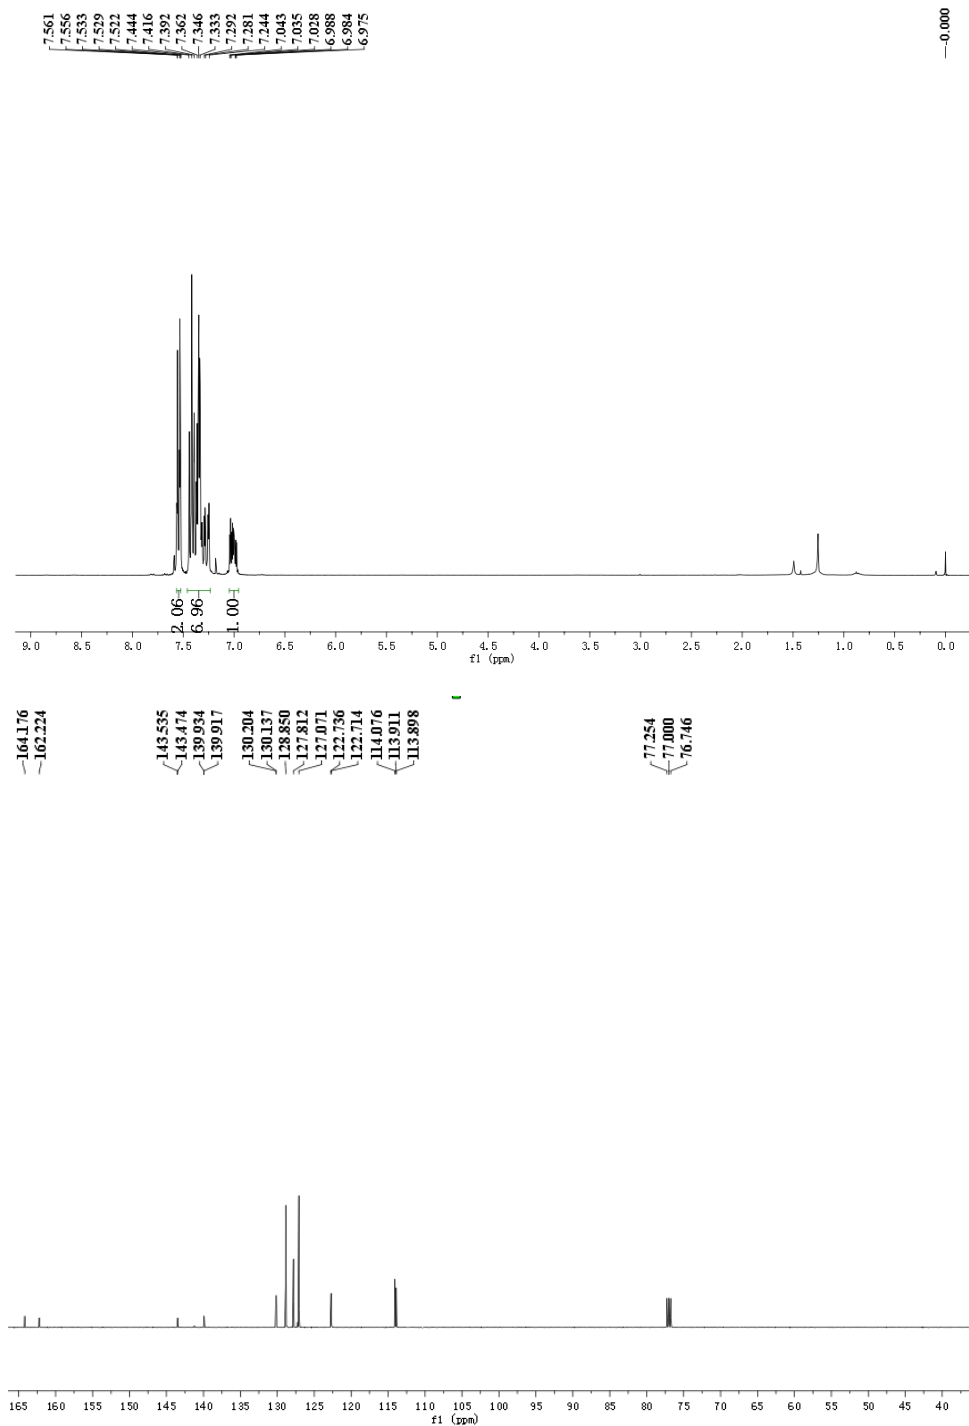



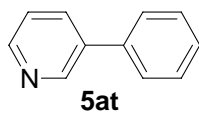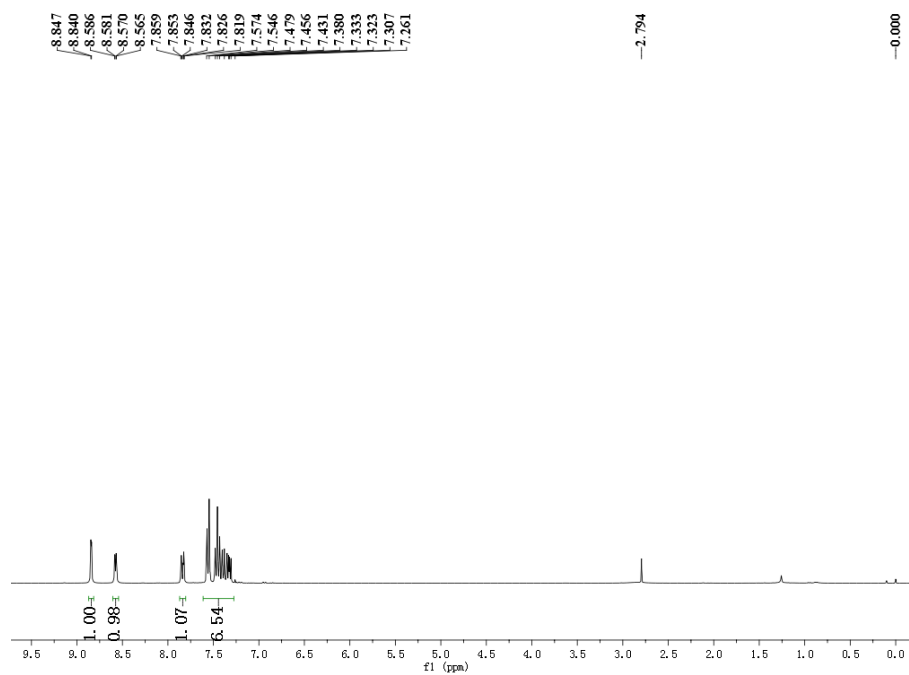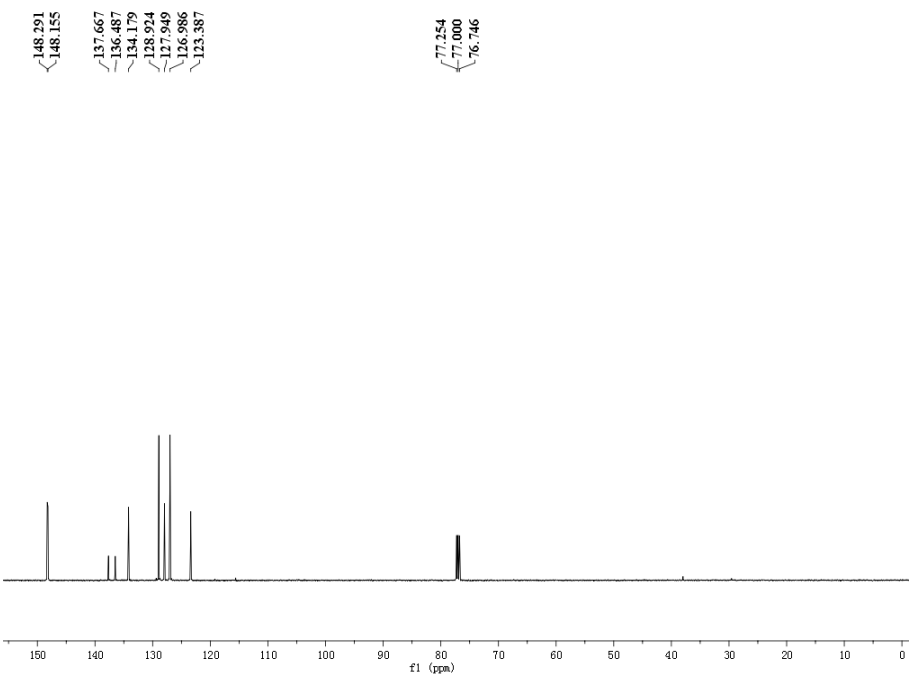

Supplement: c3ob41382a.pdf [file c3ob41382a.pdf]
